# Supplementary material for: Microwave-activated synthesis of thiazolo[5,4-d]thiazoles by a condensation/oxidation sequence
Source: Royal Society of Chemistry journal article supplement (doi:10.1039/c3ra45015e), 2013-10-25

## Electronic Supplementary Information

### Microwave-activated synthesis of thiazolo[5,4-*d*]thiazoles by a condensation/oxidation sequence

Alessio Dessì,<sup>a,b</sup> Massimo Calamante,<sup>a,b</sup> Alessandro Mordini,<sup>a,b</sup> Lorenzo Zani,<sup>b,c</sup> Maurizio  
Taddei<sup>d</sup> and Gianna Reginato<sup>b,\*</sup>

<sup>a</sup> *Università degli Studi di Firenze, Dipartimento di Chimica “Ugo Schiff”, Via della Lastruccia 13,  
50019 Sesto Fiorentino, Italy;* <sup>b</sup> *CNR - Istituto di Chimica dei Composti Organometallici (CNR-  
ICCOM), Via Madonna del Piano 10, 50019 Sesto Fiorentino, Italy;* <sup>c</sup> *CNR– Istituto per la Sintesi  
Organica e la Fotoreattività (CNR-ISOF), Via Piero Gobetti 101, 40129 Bologna, Italy;* <sup>d</sup>  
*Università degli Studi di Siena, Dipartimento di Biotecnologie, Chimica e Farmacia, Via A. Moro  
2, 53100 Siena, Italy.*

email: [gianna.reginato@iccom.cnr.it](mailto:gianna.reginato@iccom.cnr.it)

## Table of Contents

|                                                                  |         |
|------------------------------------------------------------------|---------|
| <sup>1</sup> H and <sup>13</sup> C spectra of compound <b>1b</b> | S3-S4   |
| <sup>1</sup> H and <sup>13</sup> C spectra of compound <b>1c</b> | S5-S6   |
| <sup>1</sup> H and <sup>13</sup> C spectra of compound <b>1d</b> | S7-S8   |
| <sup>1</sup> H and <sup>13</sup> C spectra of compound <b>1e</b> | S9-S10  |
| <sup>1</sup> H and <sup>13</sup> C spectra of compound <b>1f</b> | S11-S12 |
| <sup>1</sup> H and <sup>13</sup> C spectra of compound <b>1i</b> | S13-S14 |
| <sup>1</sup> H and <sup>13</sup> C spectra of compound <b>1j</b> | S15-S16 |
| <sup>1</sup> H and <sup>13</sup> C spectra of compound <b>1k</b> | S17-S18 |
| <sup>1</sup> H and <sup>13</sup> C spectra of compound <b>1l</b> | S19-S20 |
| <sup>1</sup> H and <sup>13</sup> C spectra of compound <b>1m</b> | S21-S22 |
| <sup>1</sup> H spectrum of compound <b>1n</b>                    | S23     |
| <sup>1</sup> H and <sup>13</sup> C spectra of compound <b>1o</b> | S24-S25 |
| <sup>1</sup> H and <sup>13</sup> C spectra of compound <b>1p</b> | S26-S27 |
| <sup>1</sup> H and <sup>13</sup> C spectra of compound <b>1q</b> | S28-S29 |
| <sup>1</sup> H and <sup>13</sup> C spectra of compound <b>1r</b> | S30-S31 |
| <sup>1</sup> H and <sup>13</sup> C spectra of compound <b>4</b>  | S32-S33 |
| <sup>1</sup> H spectrum of mixture of compounds <b>1b/3</b>      | S34     |

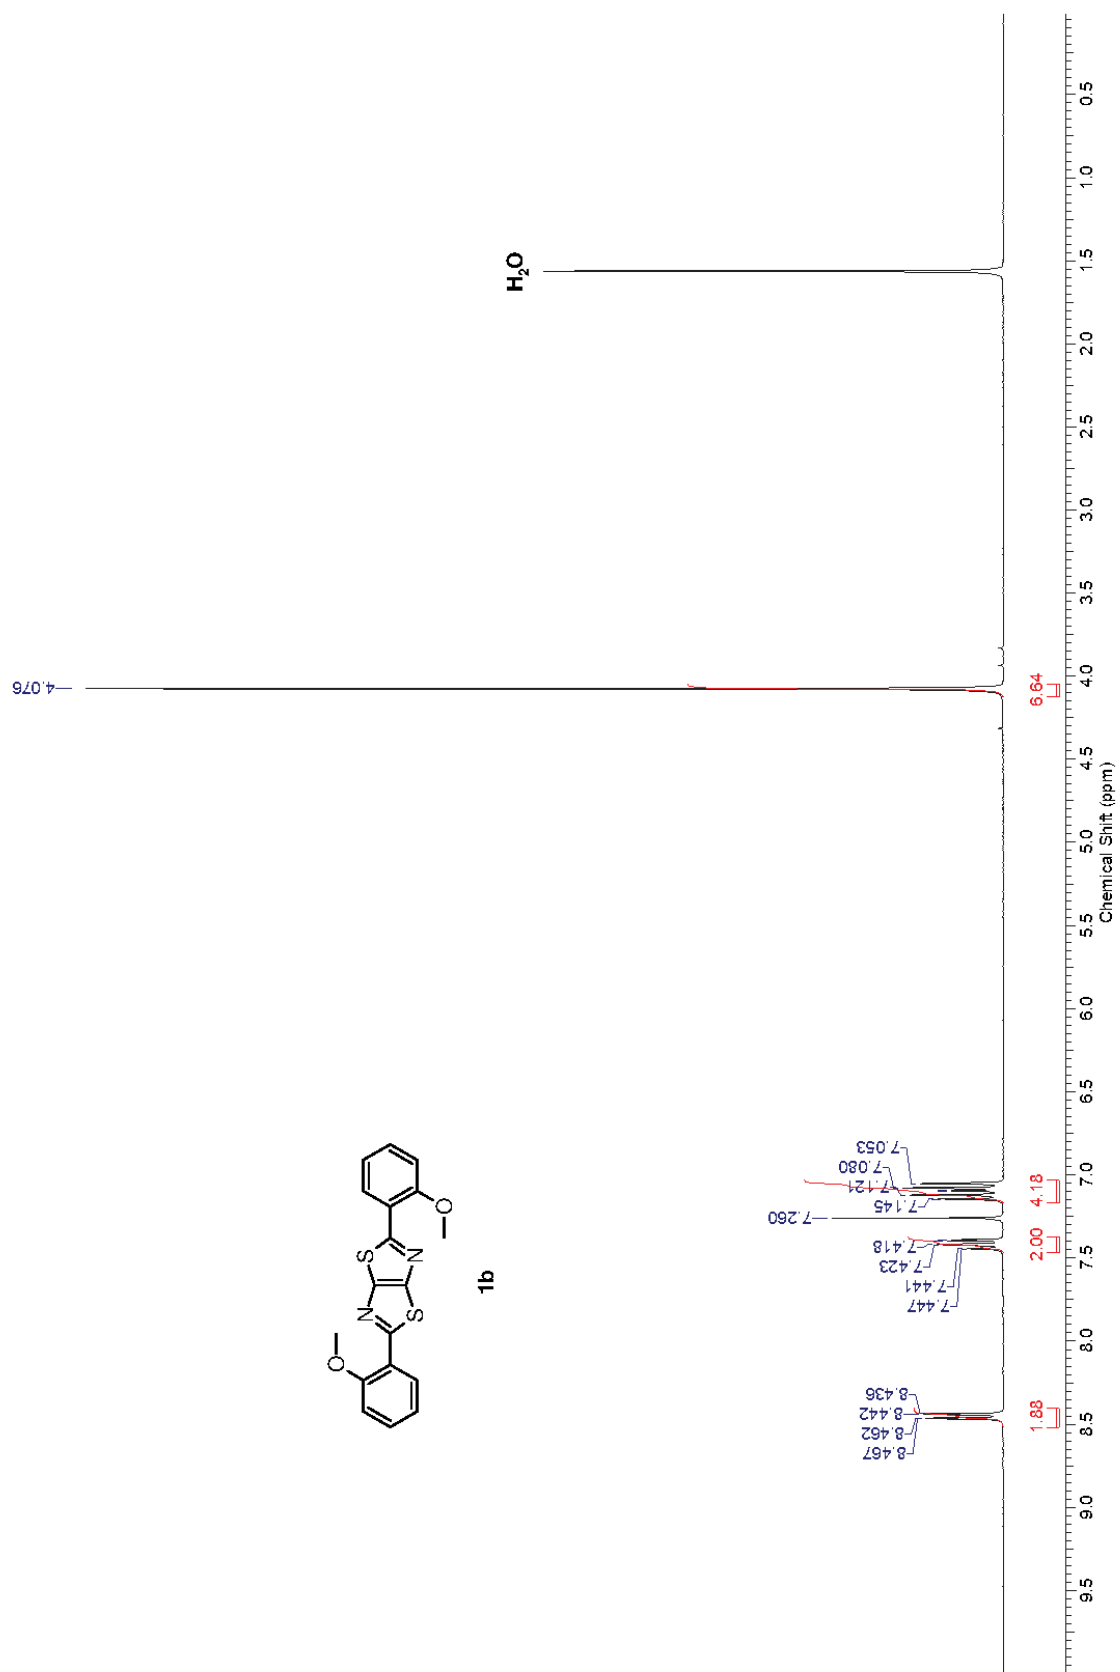

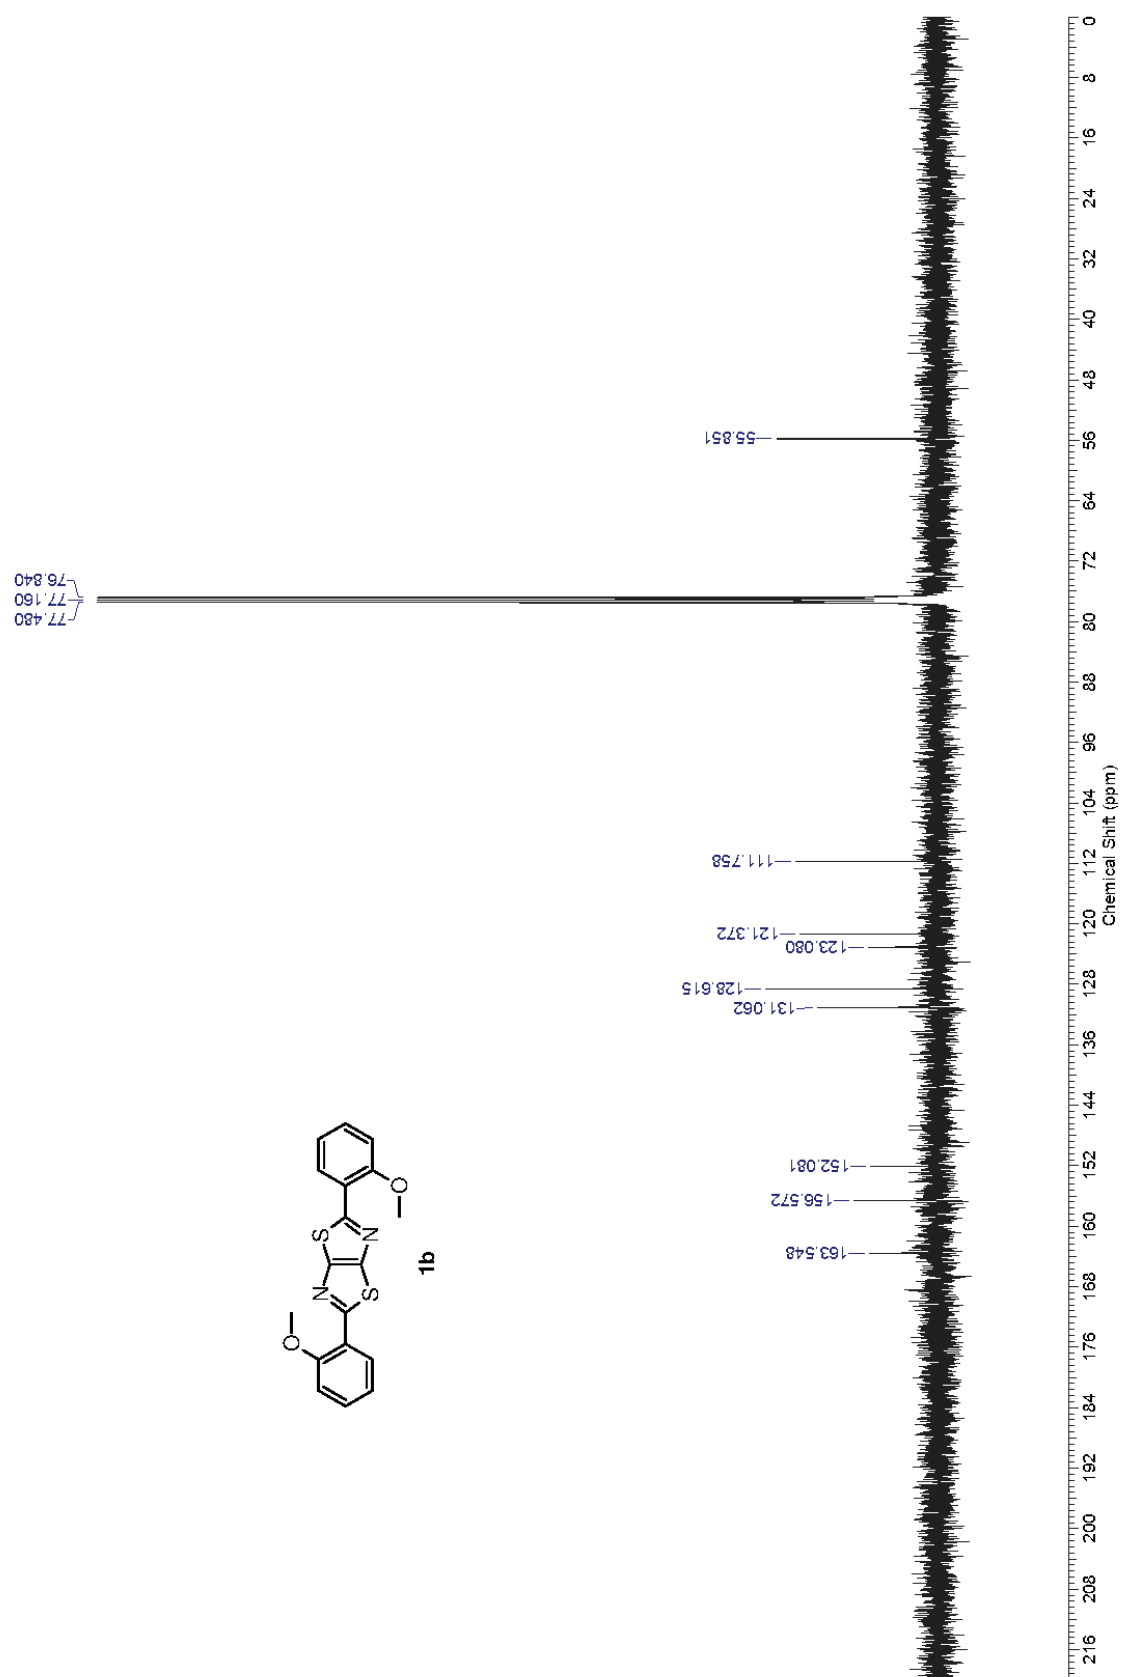

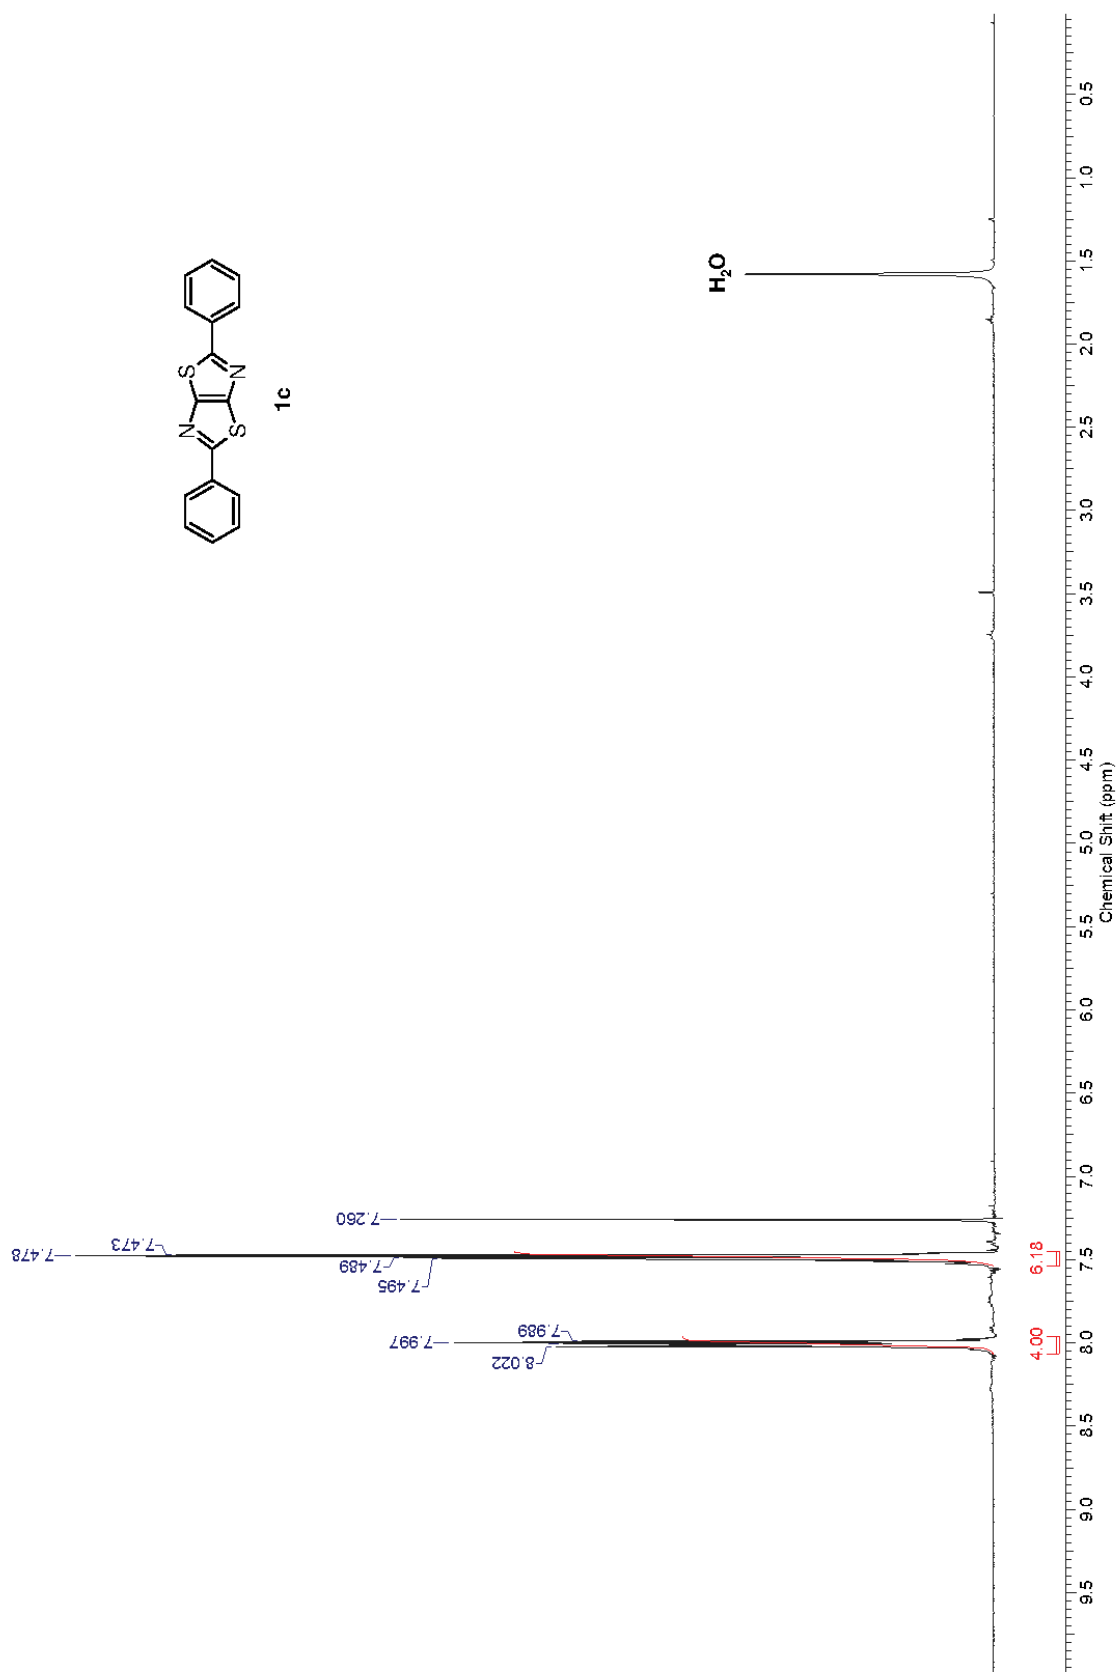

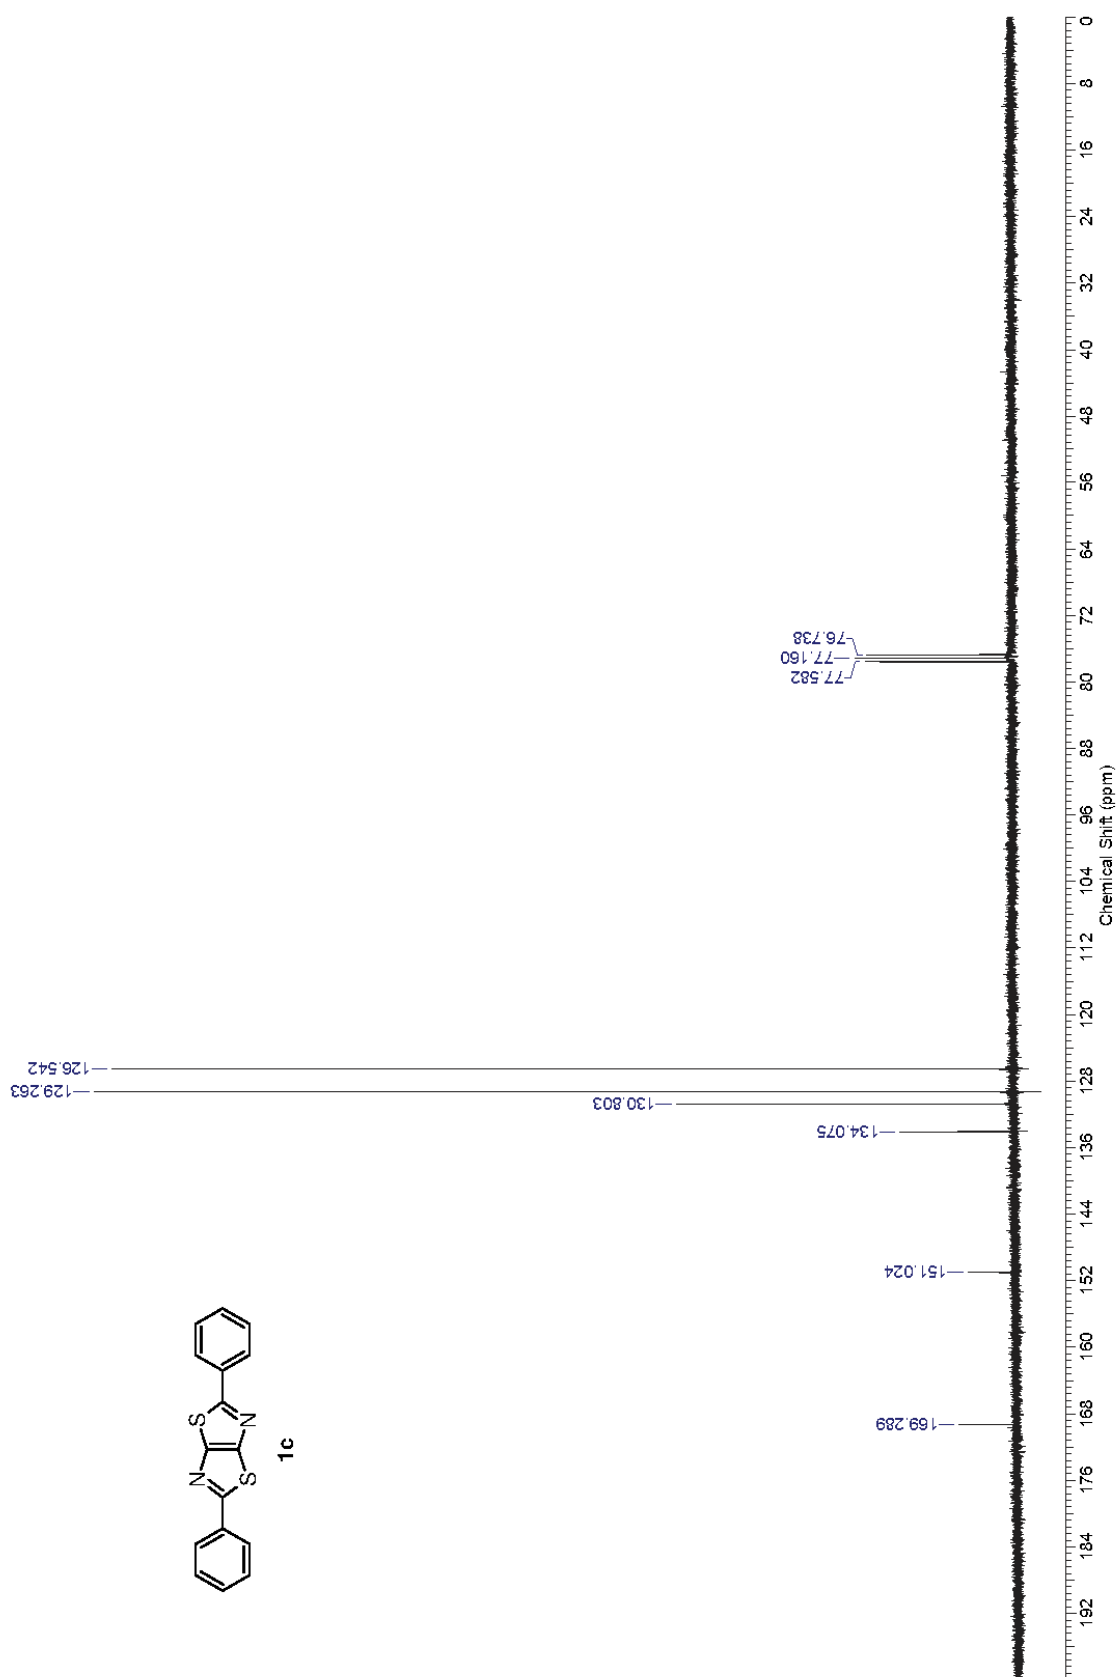

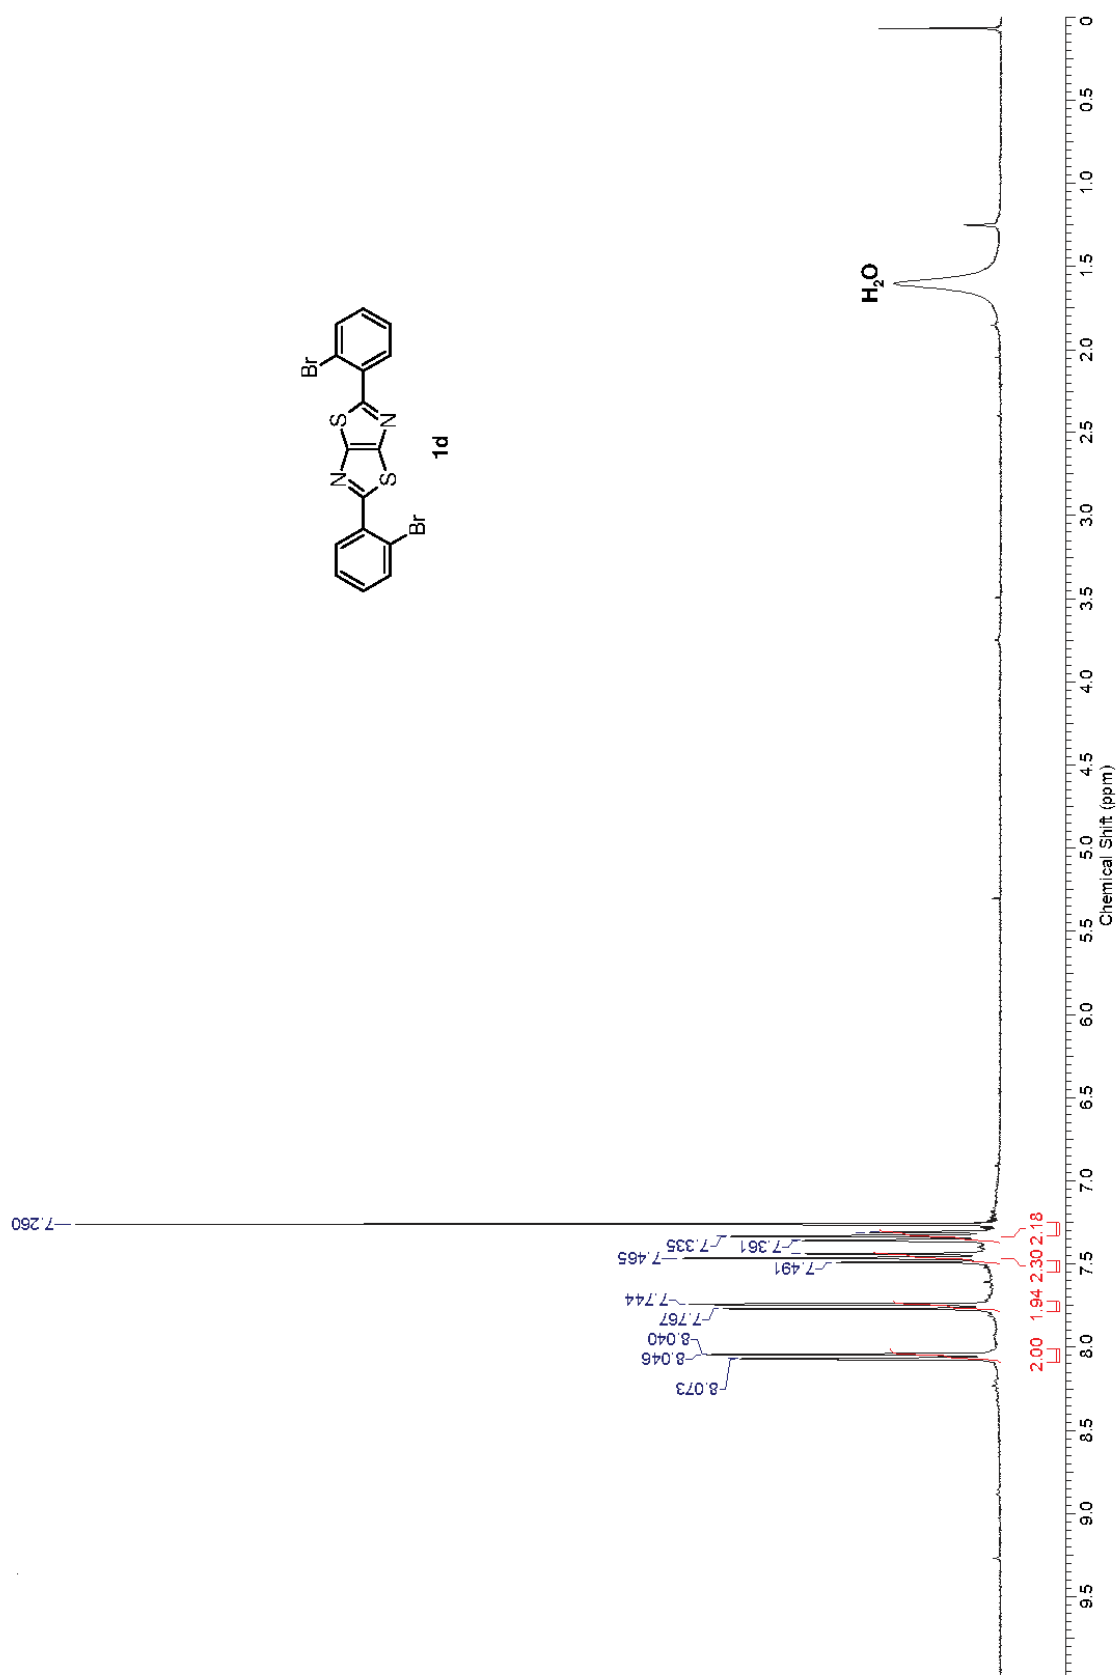

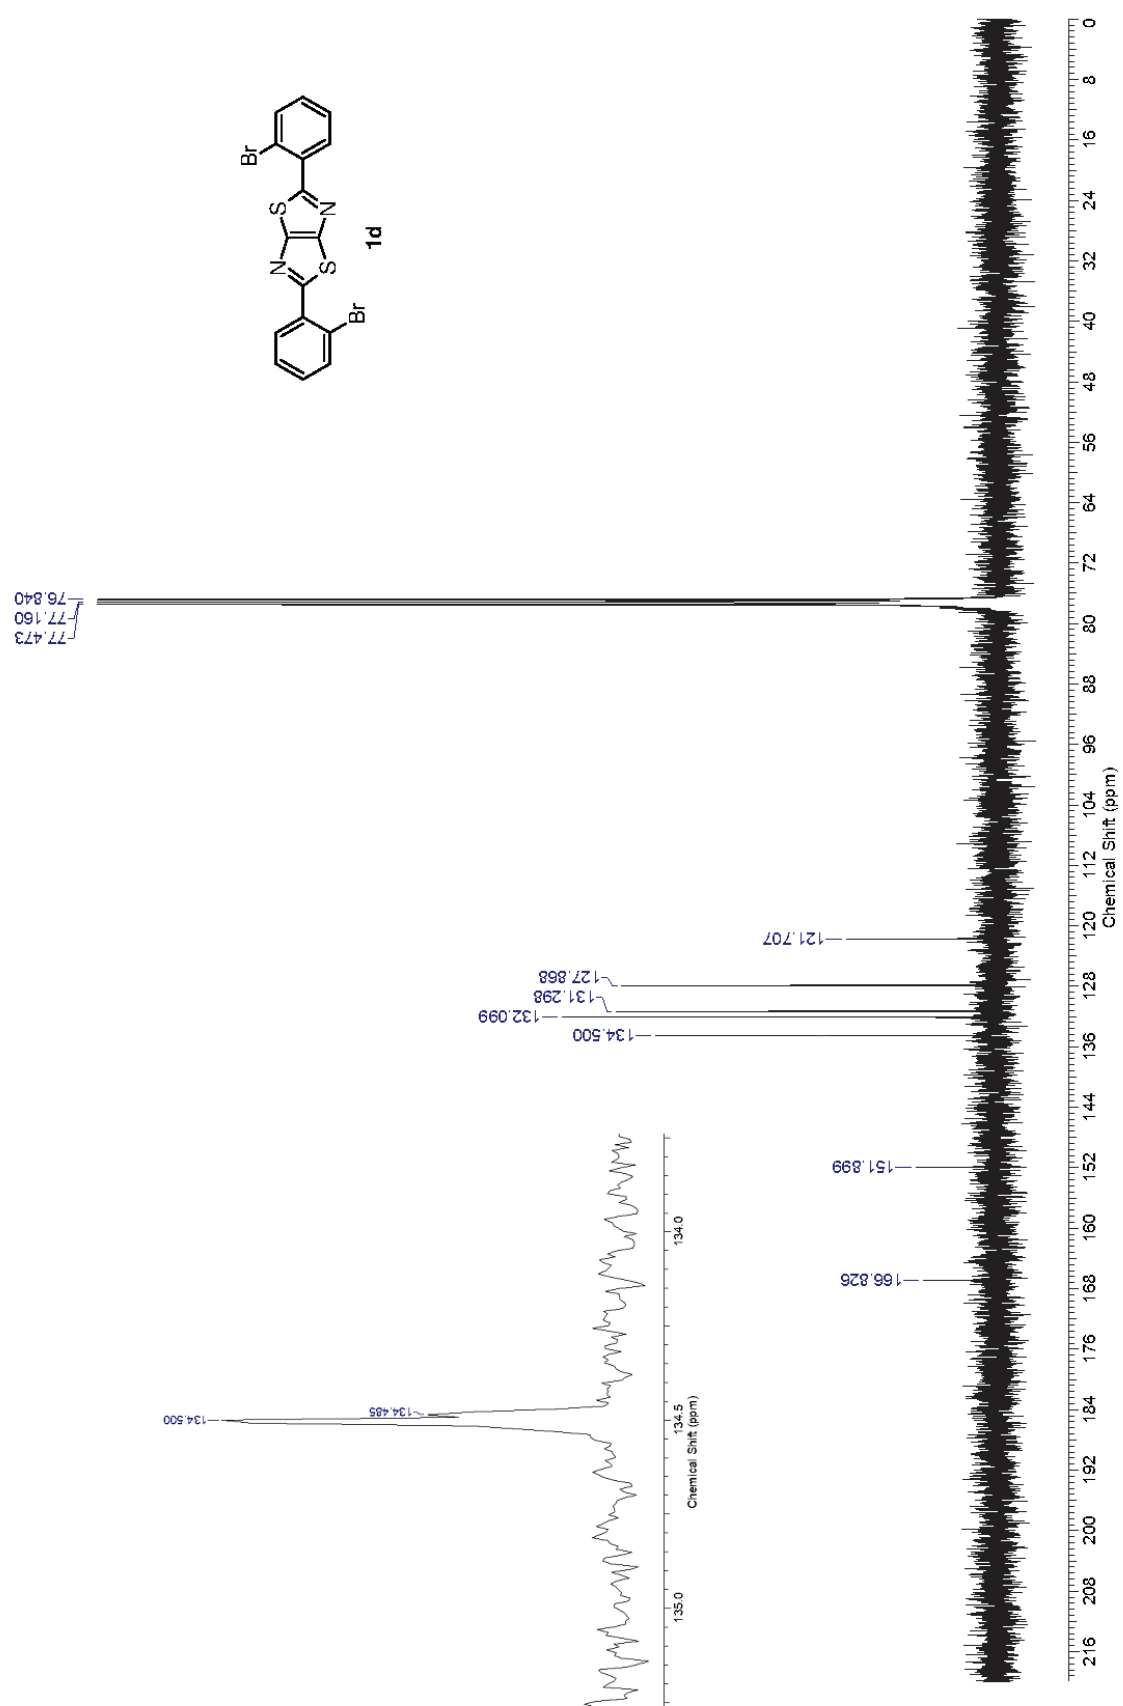



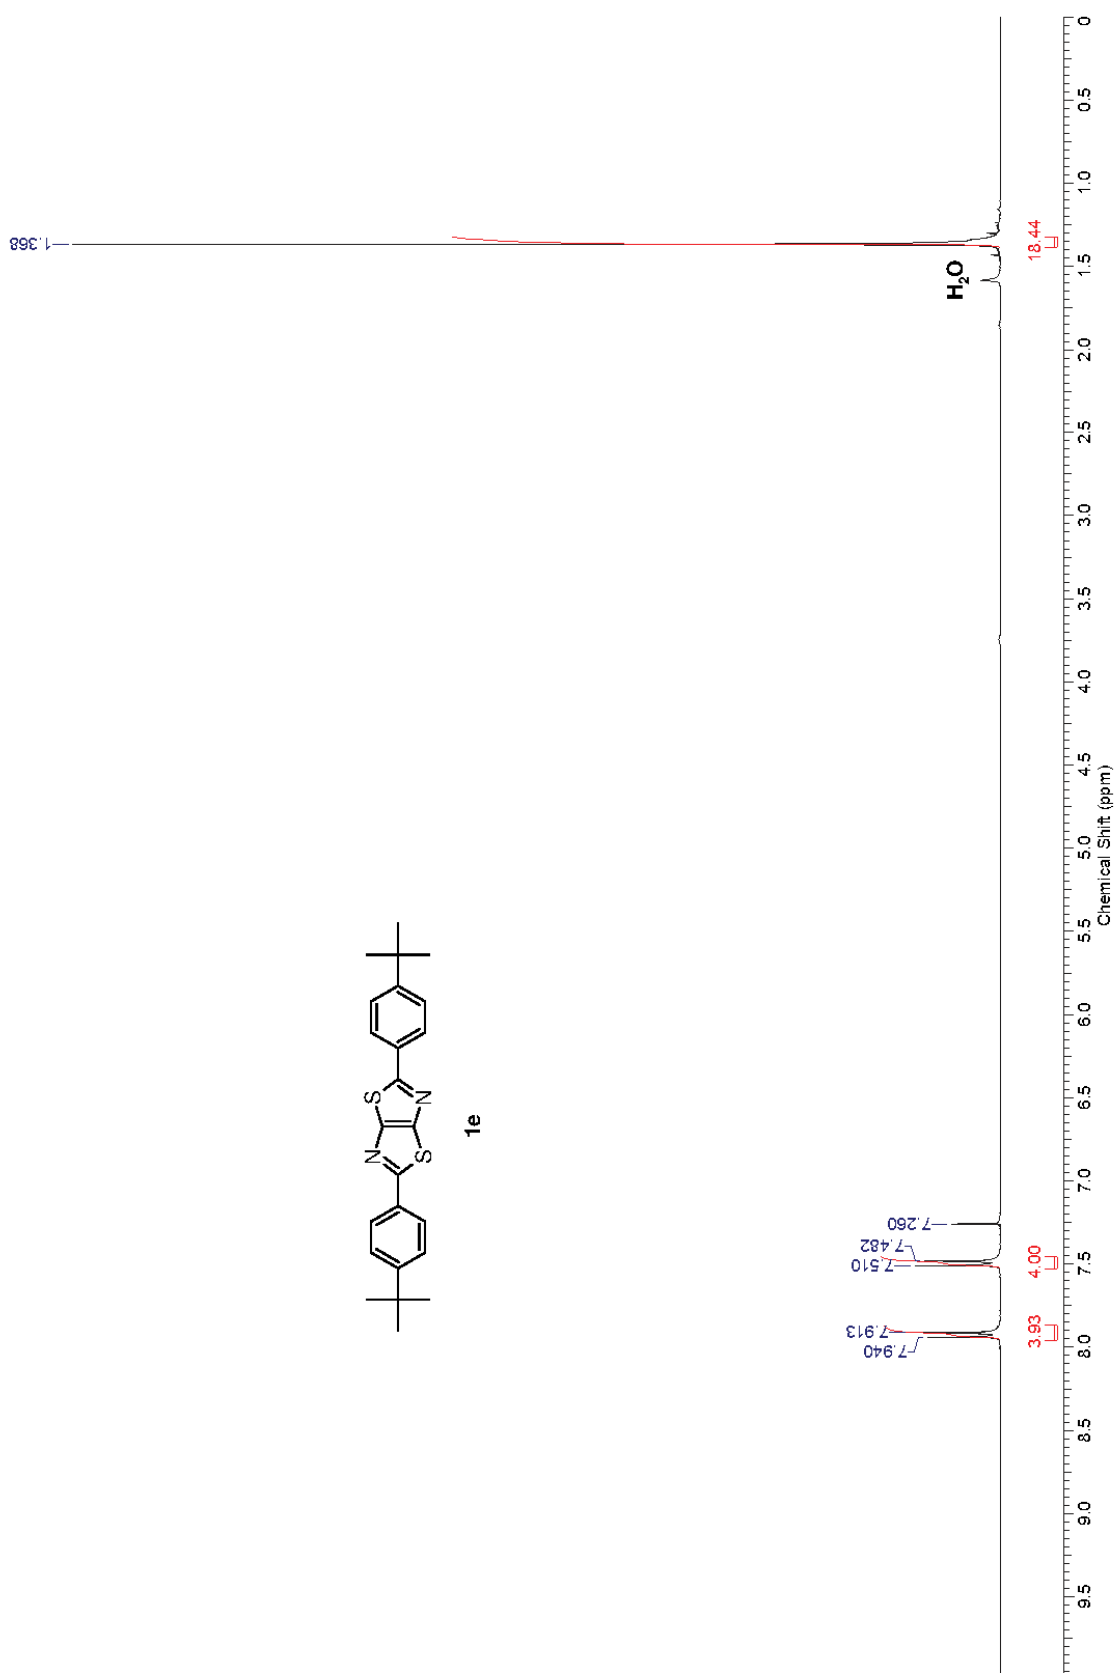

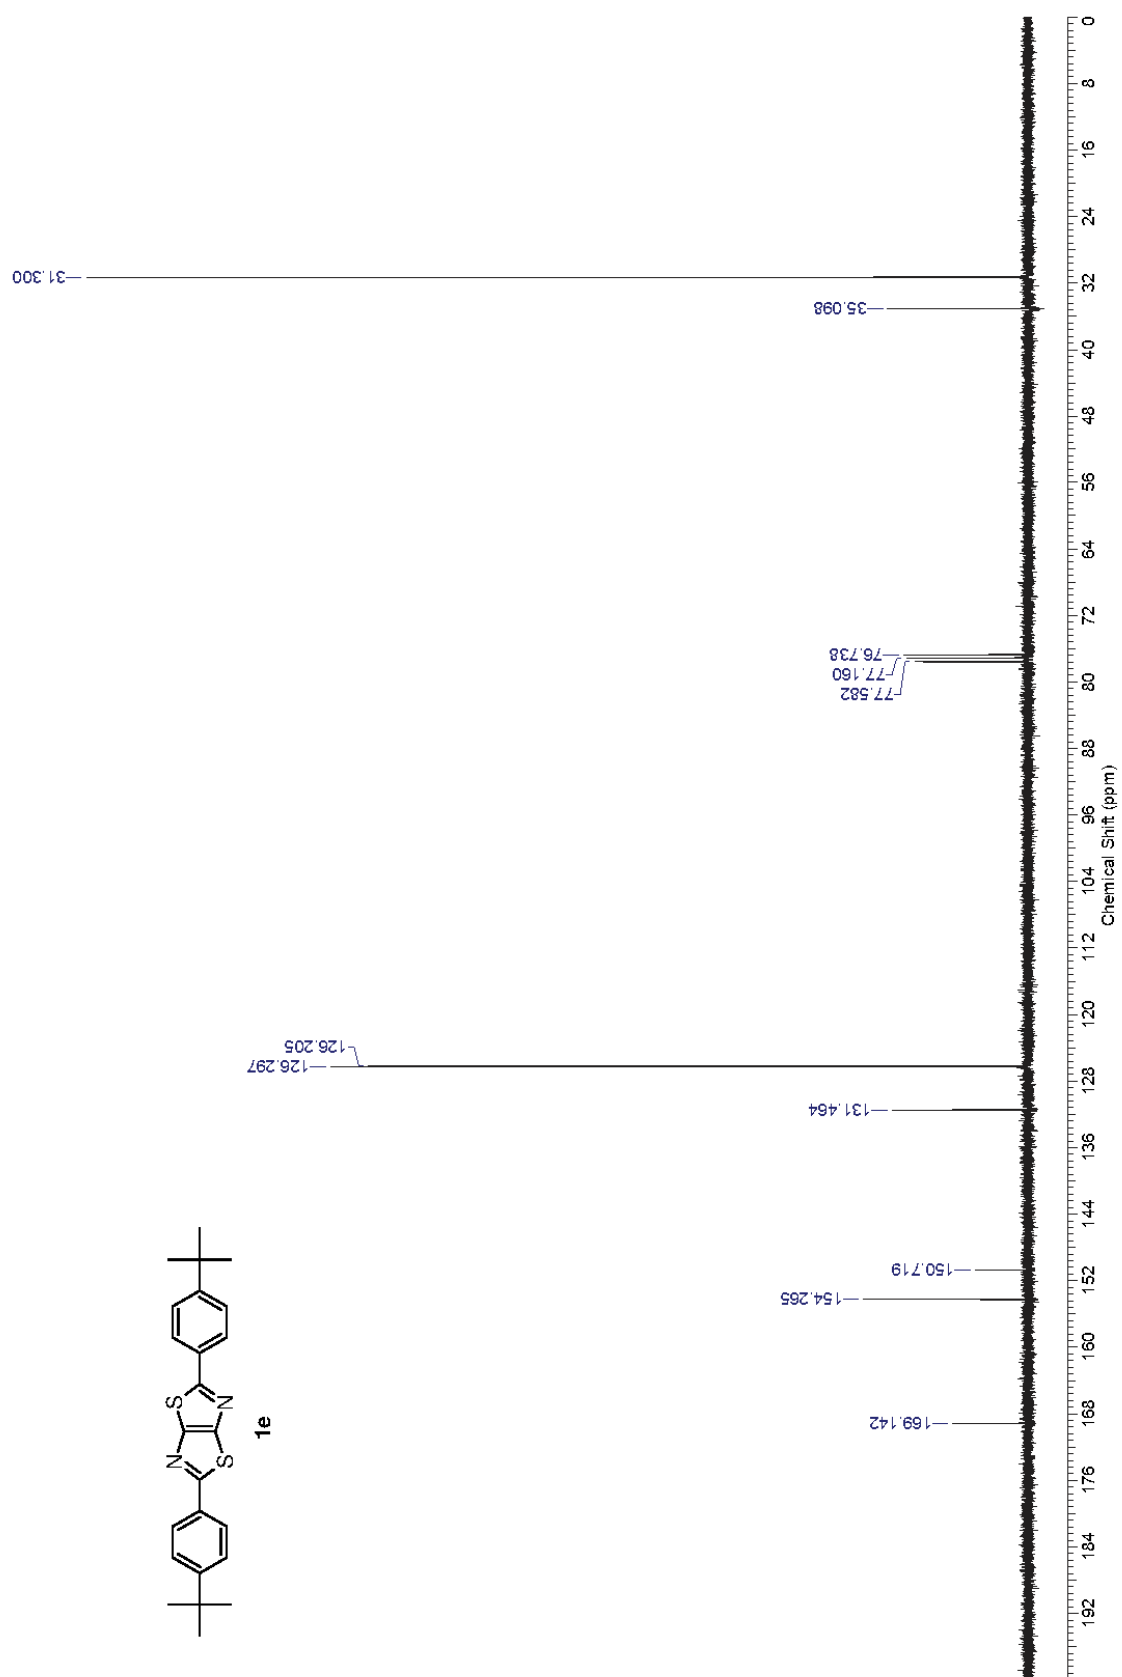

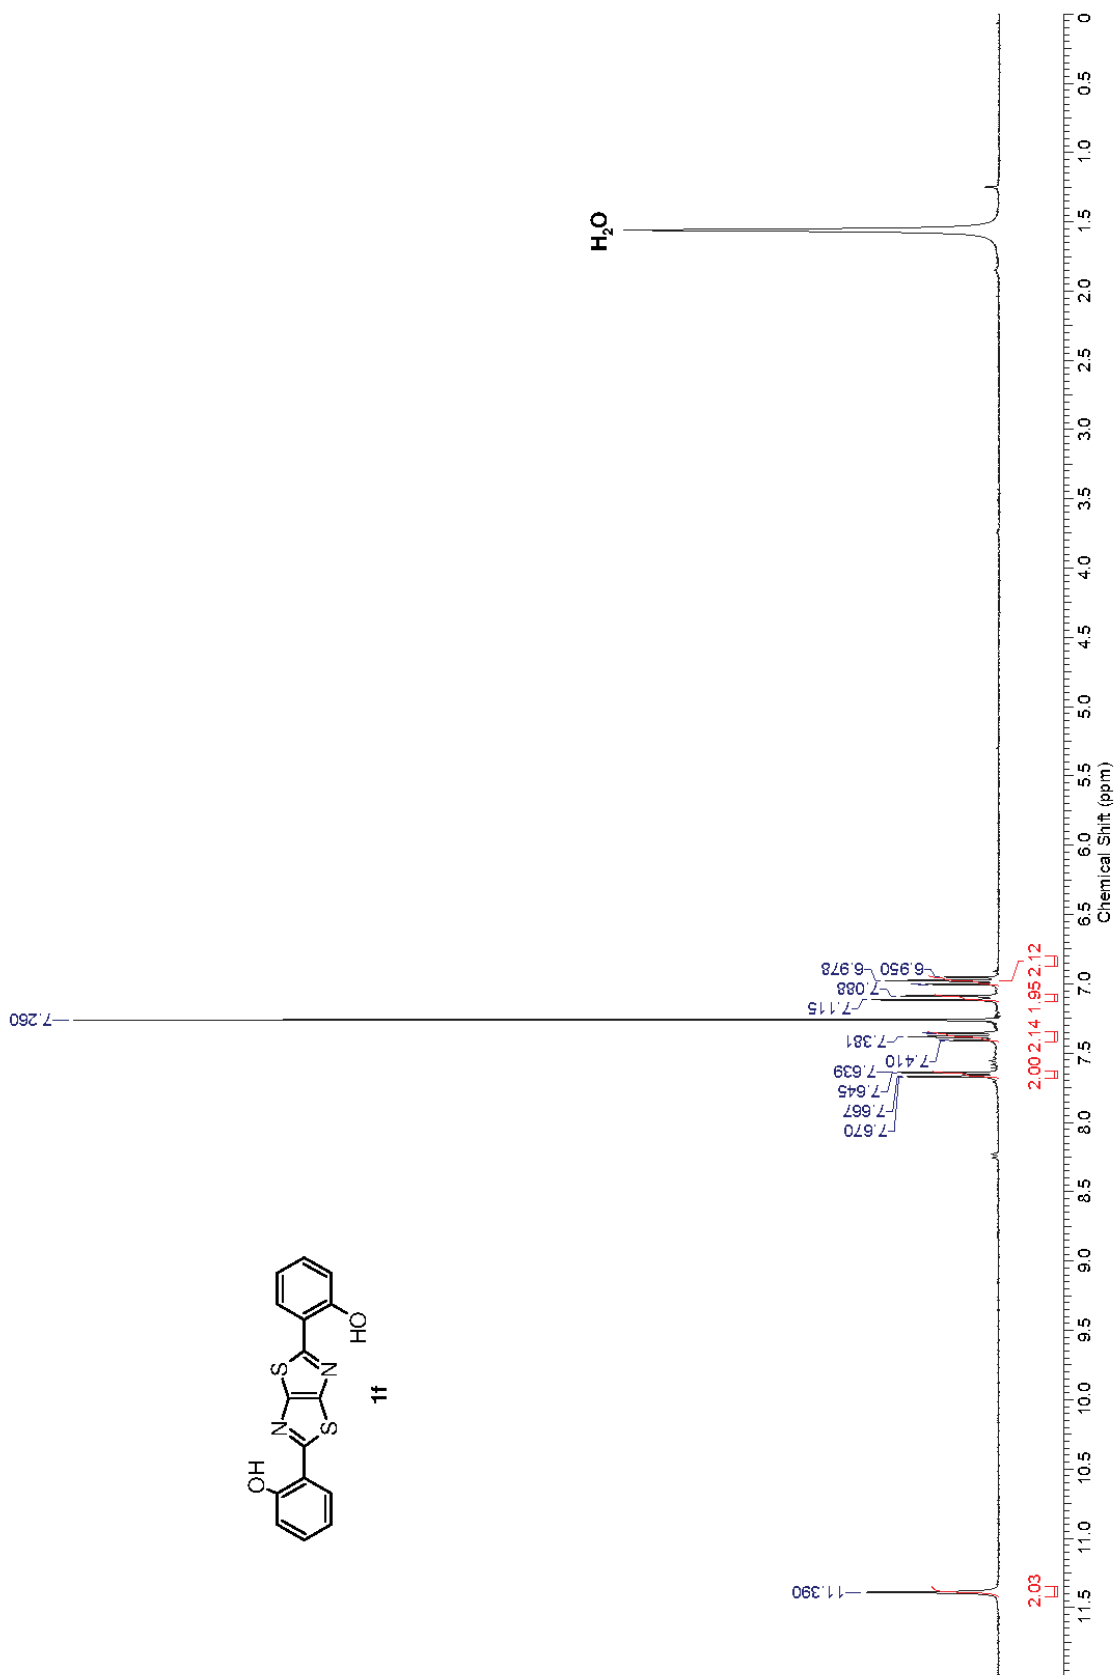

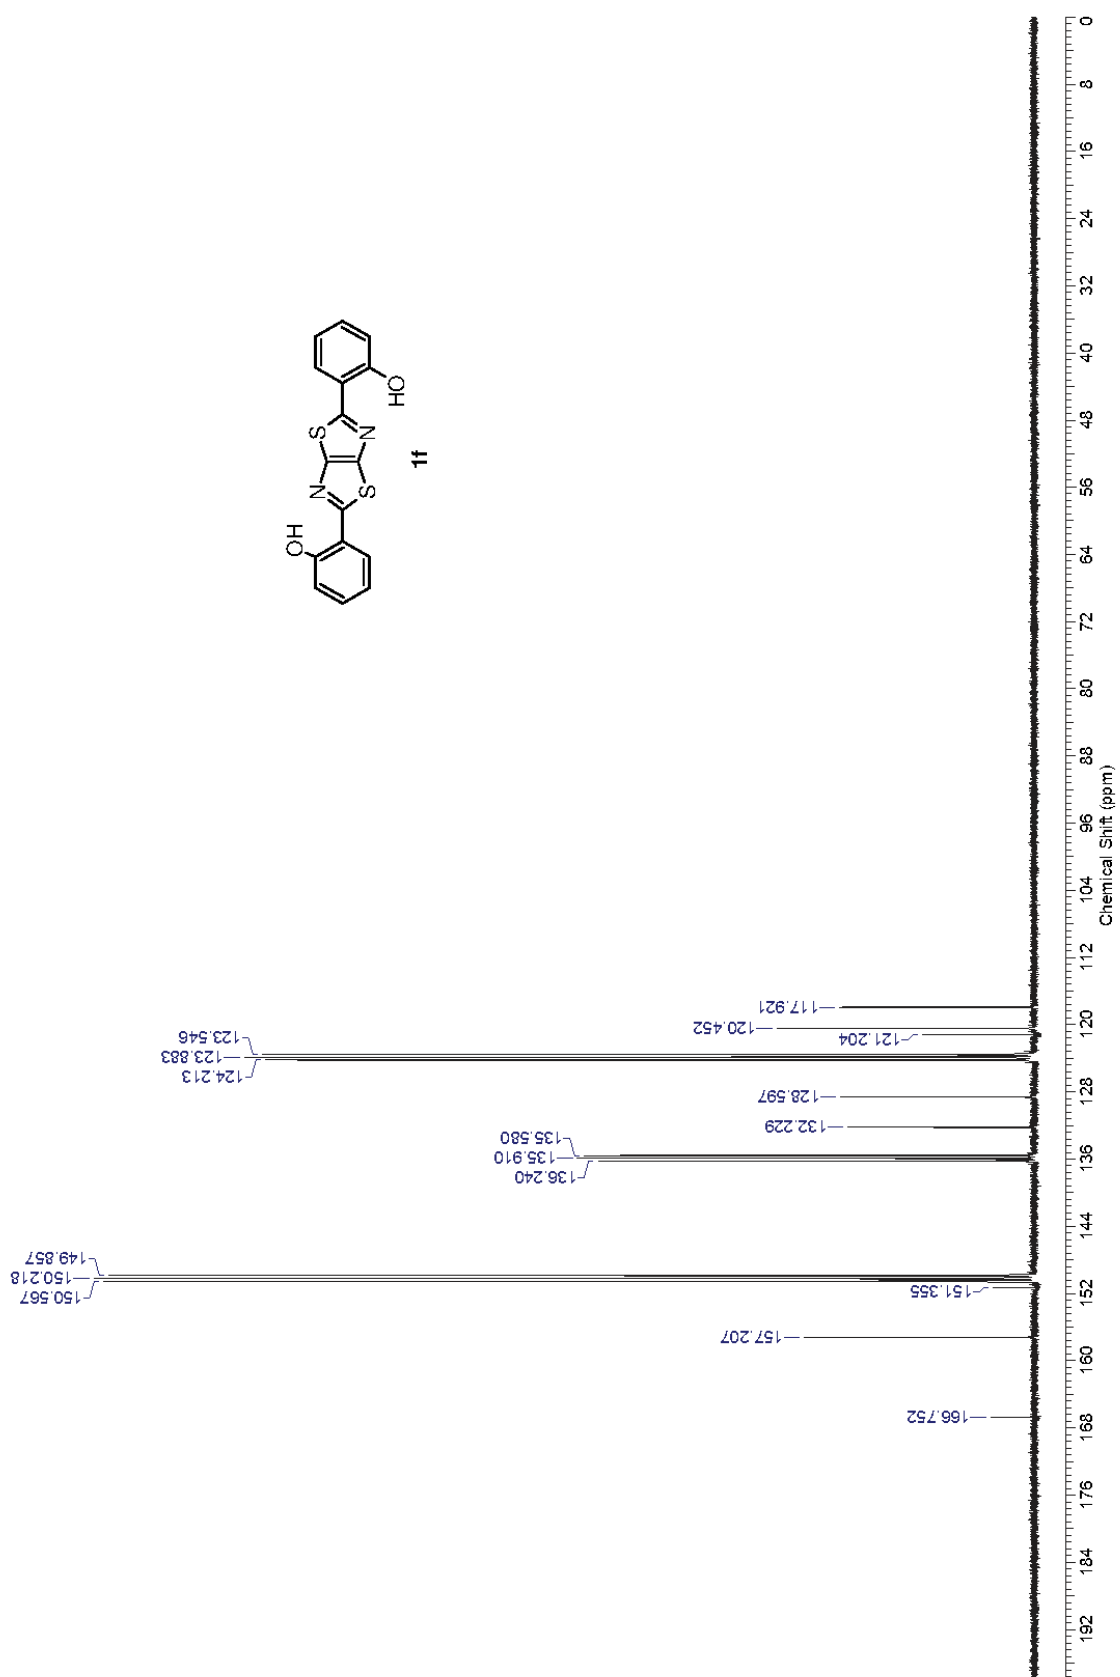

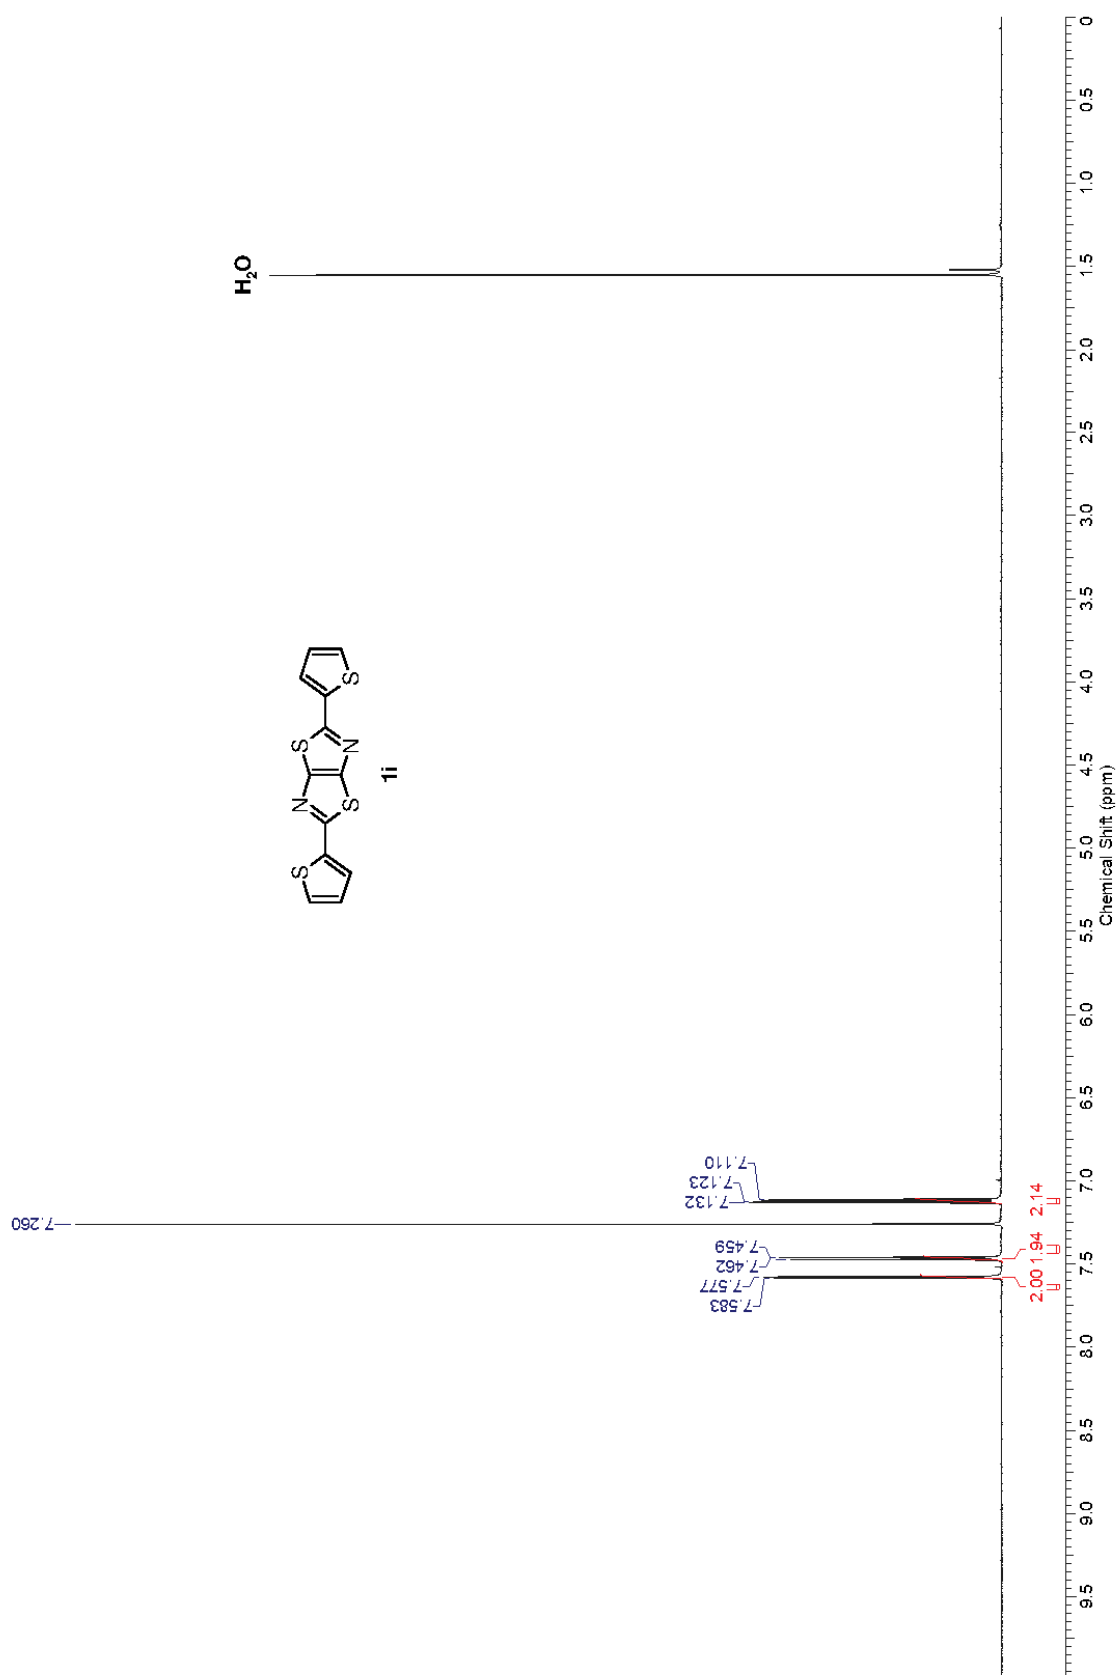

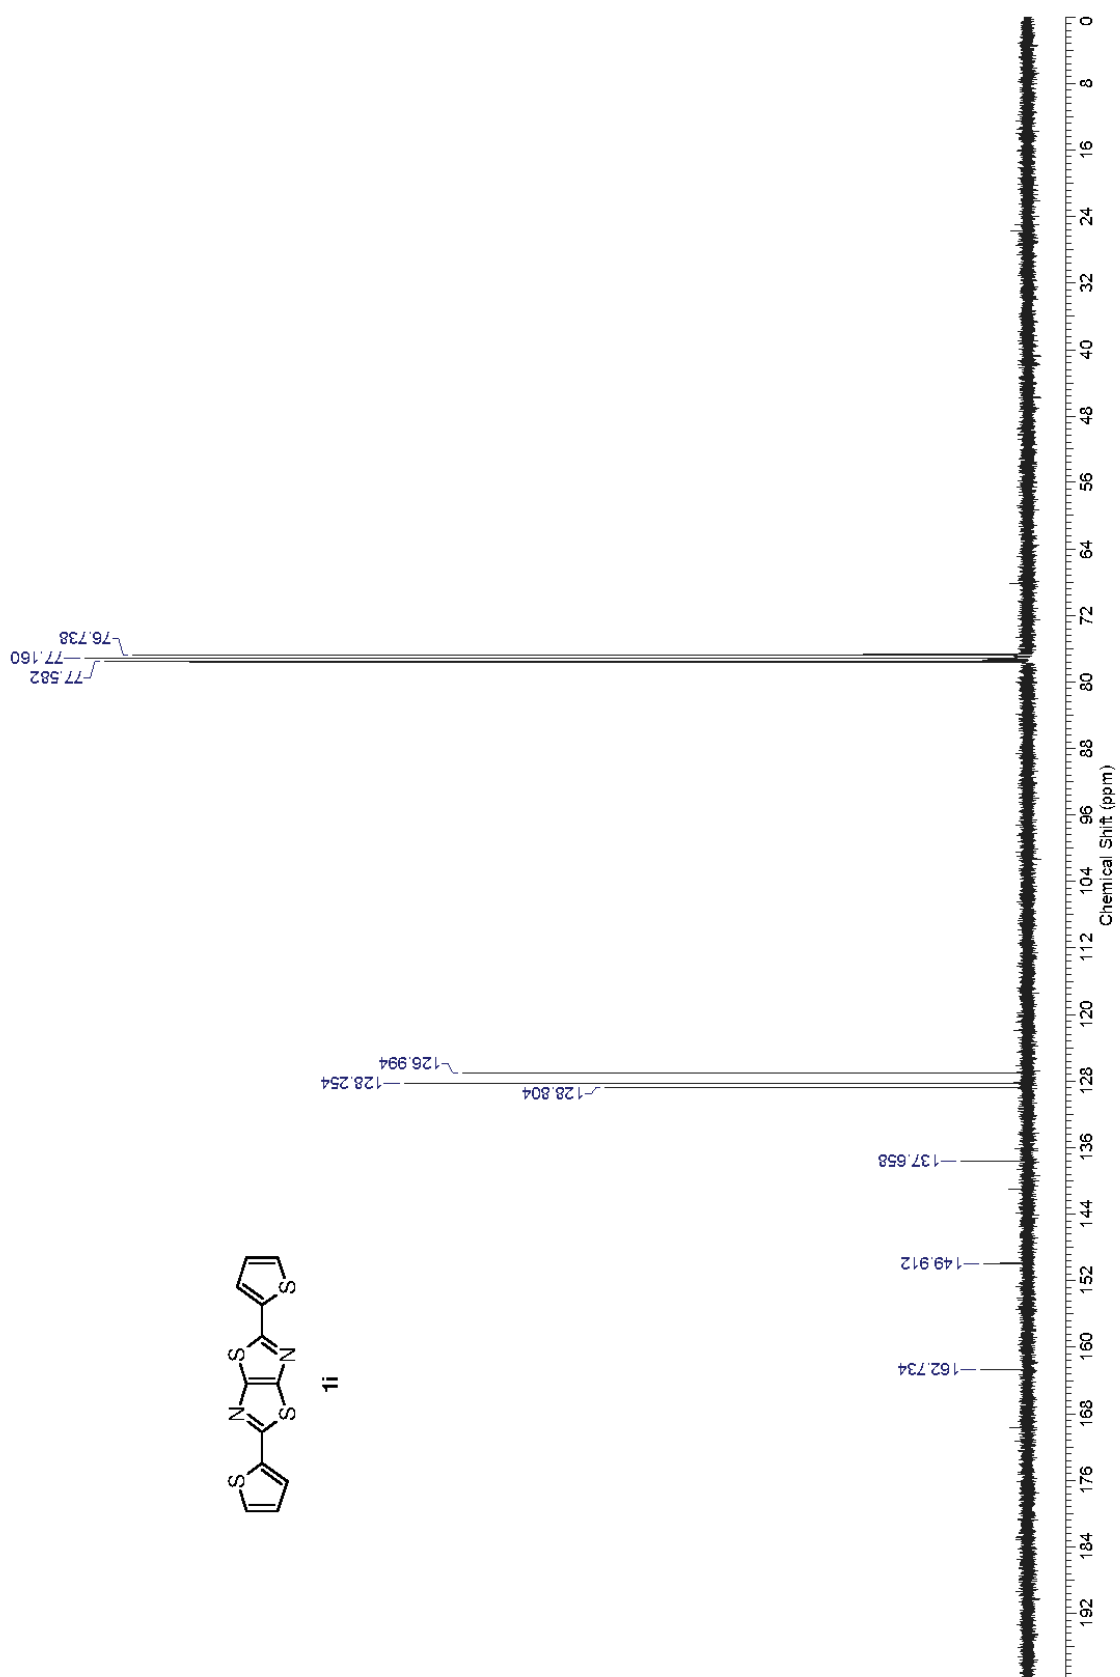

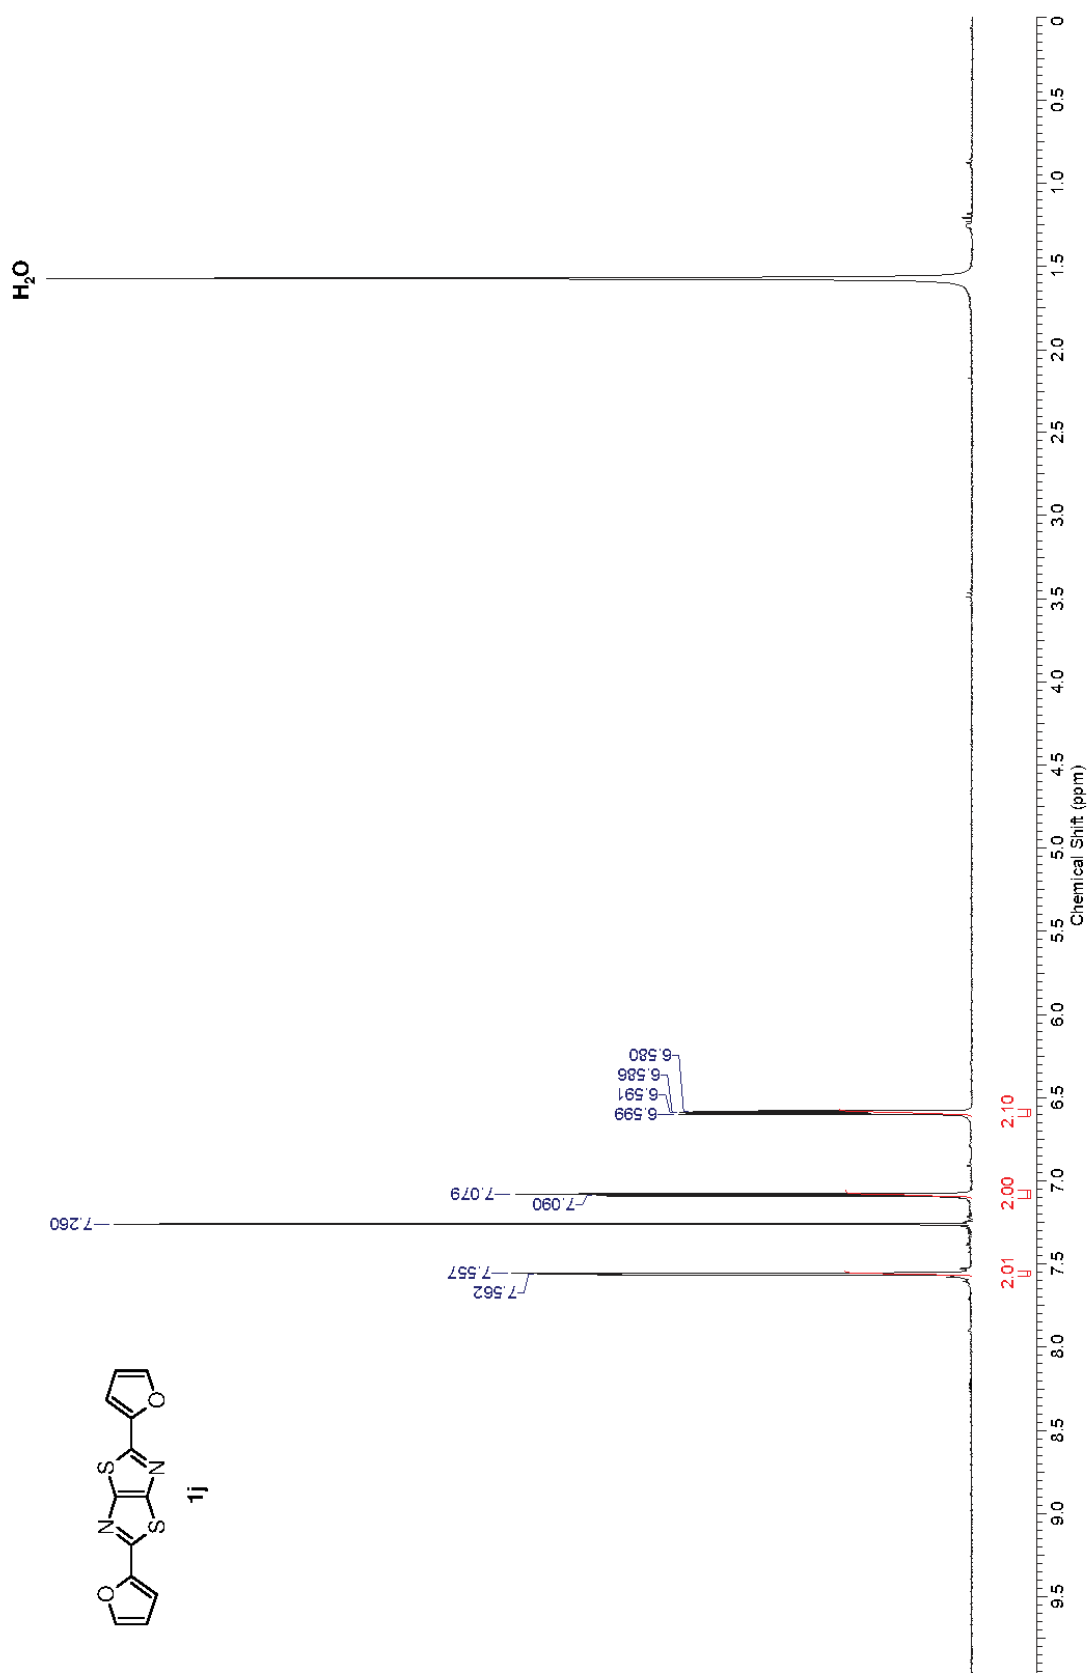

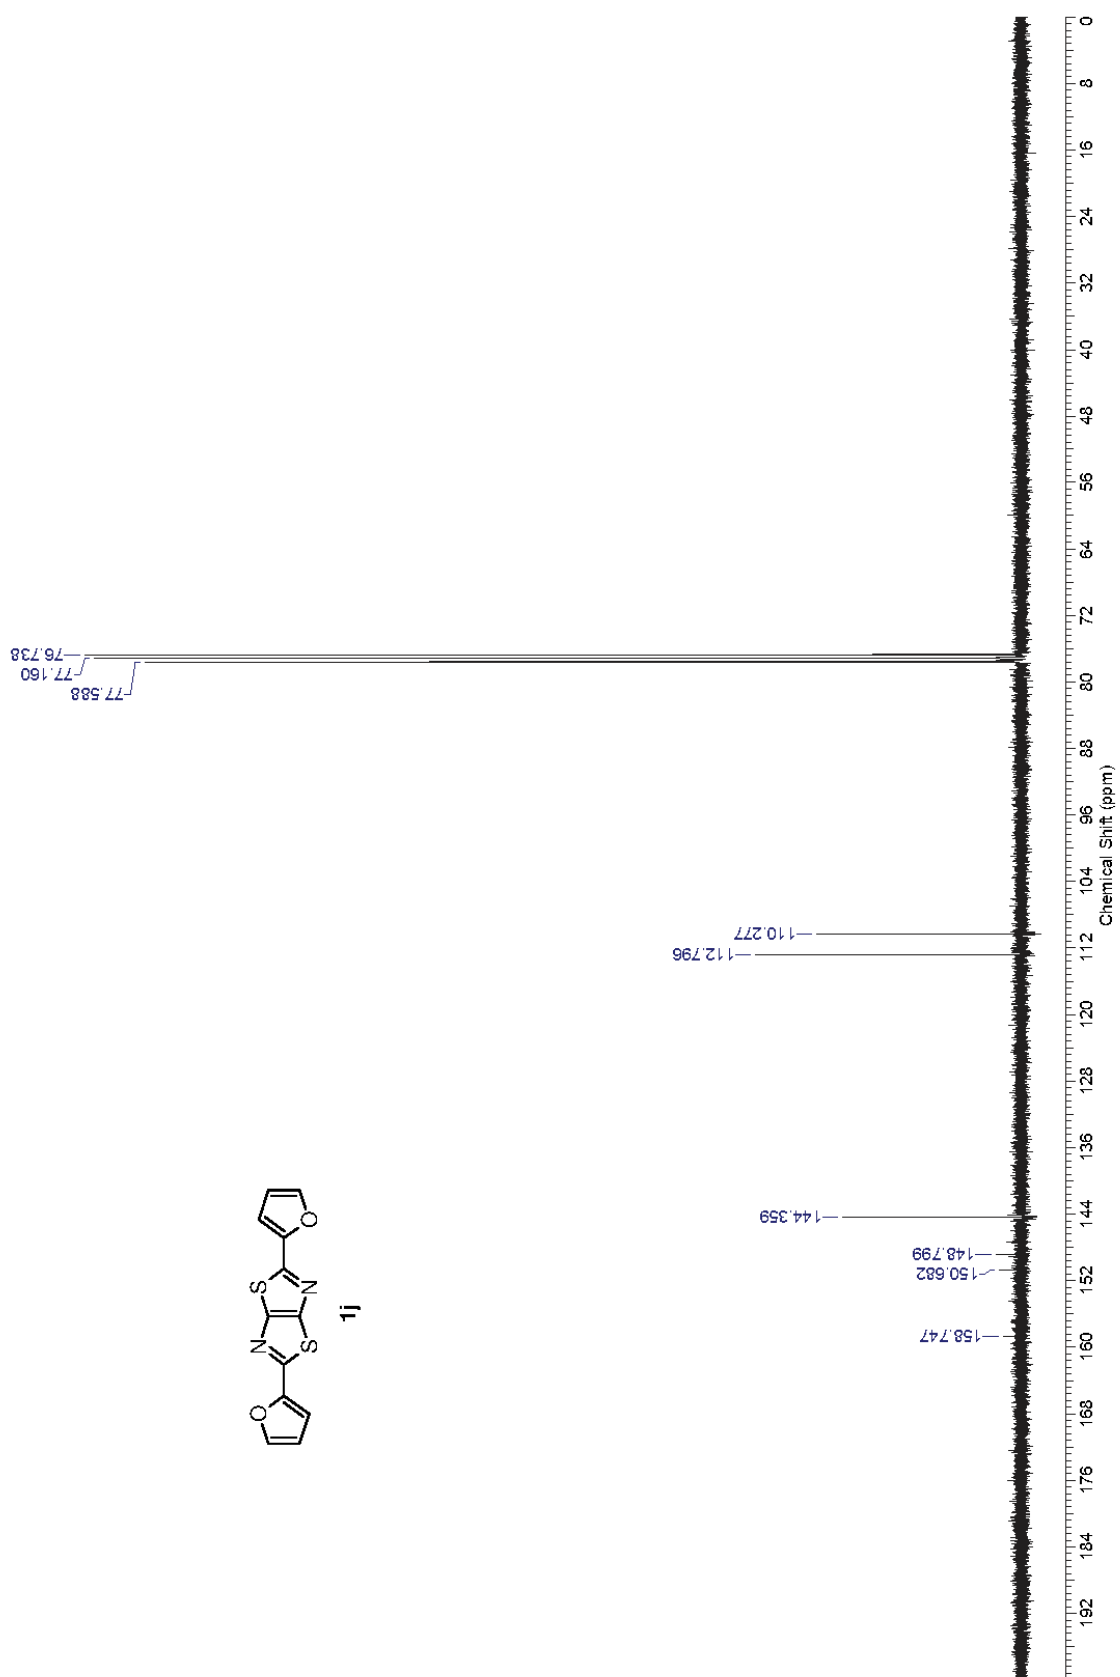



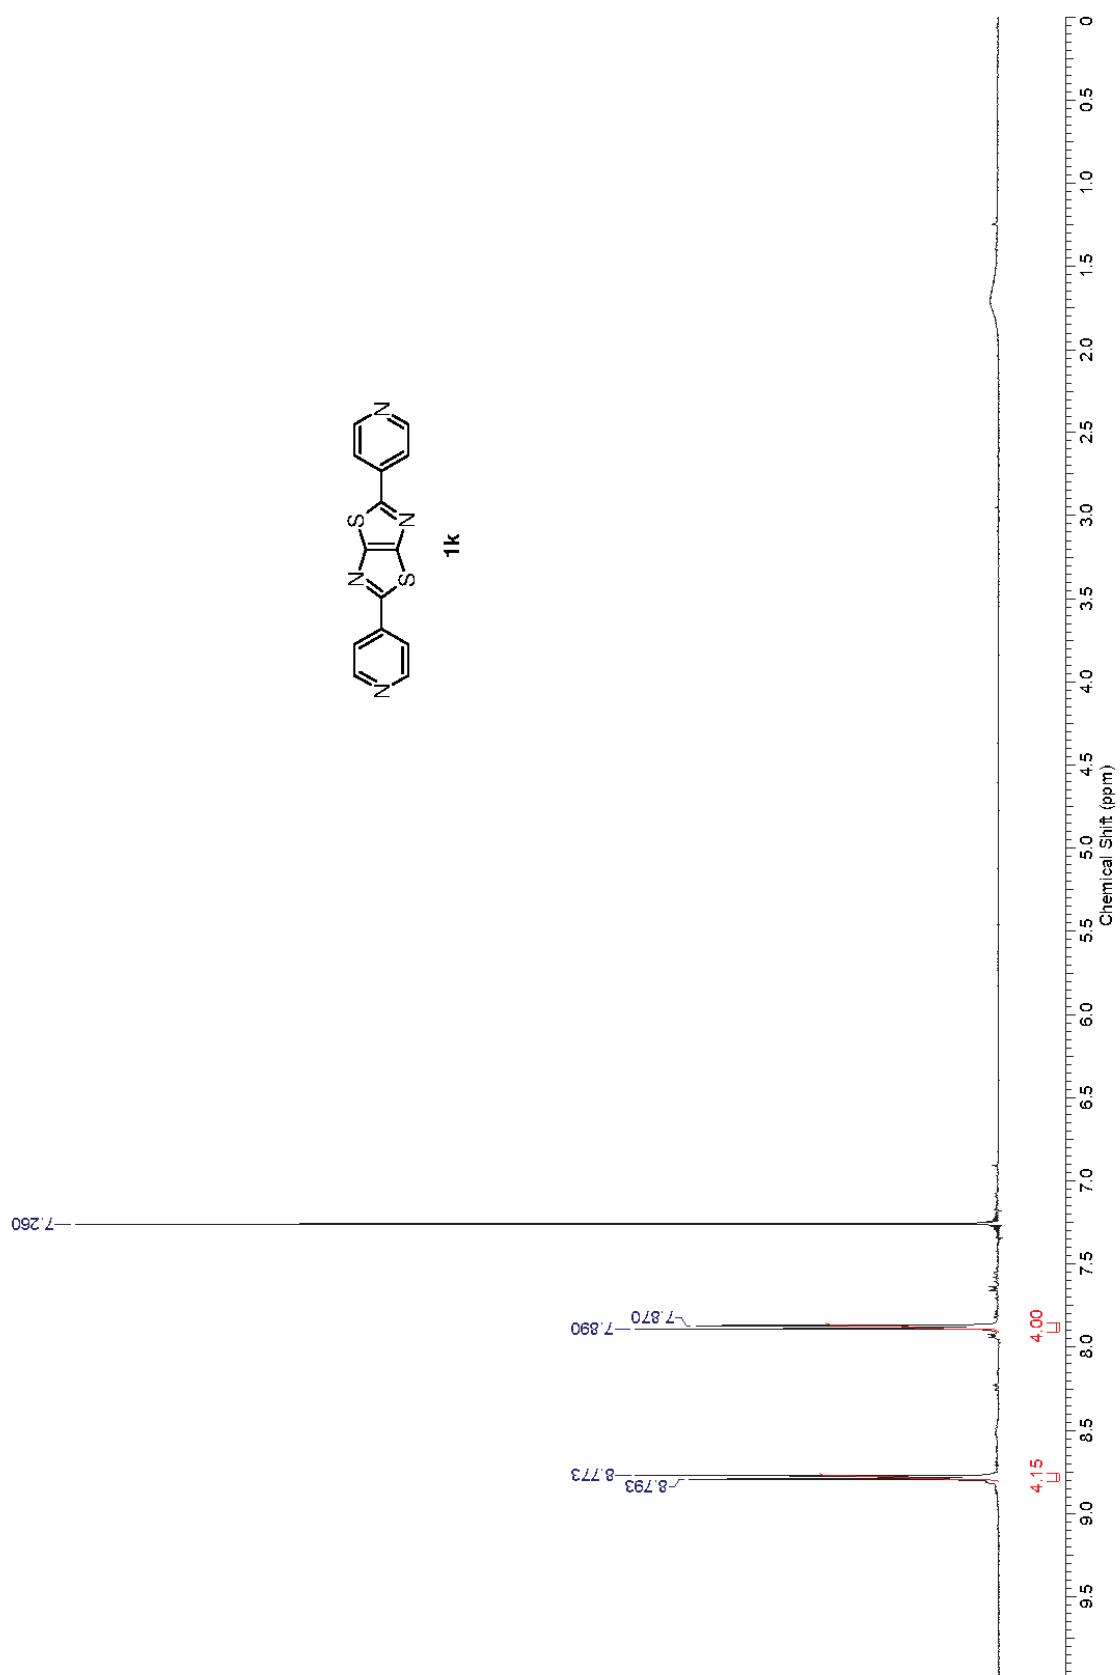

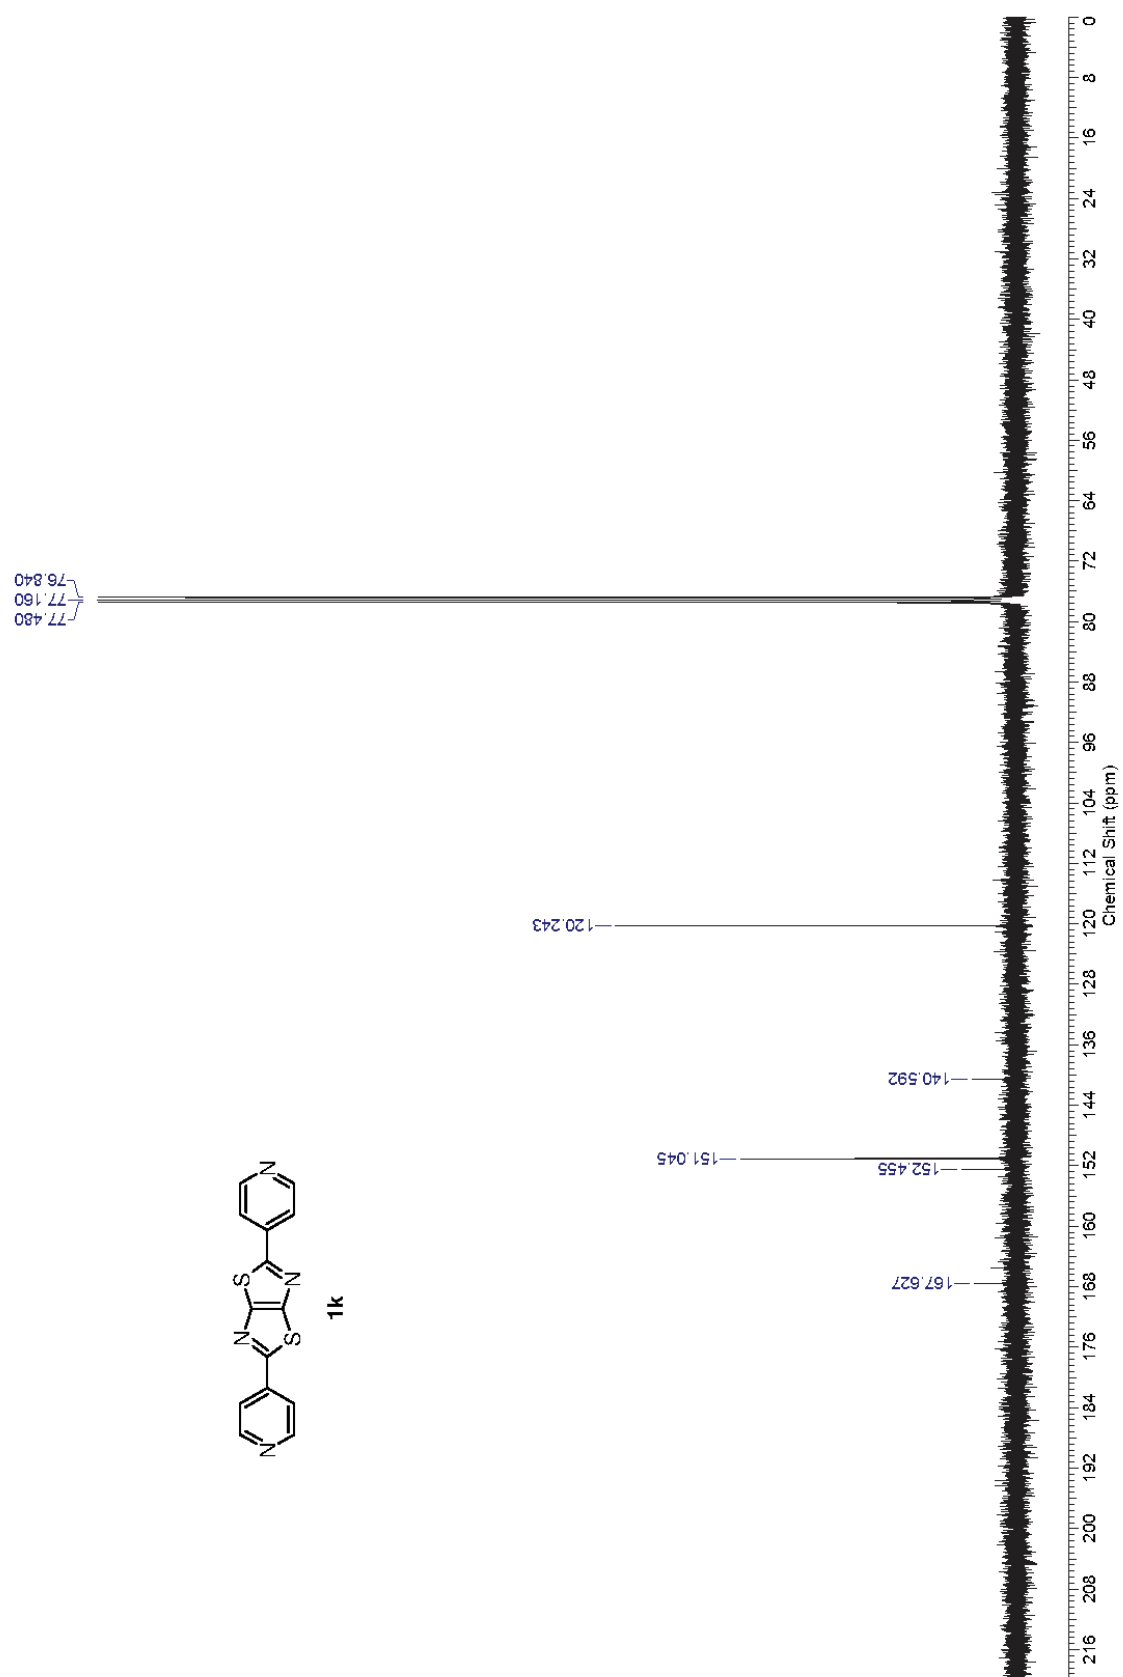

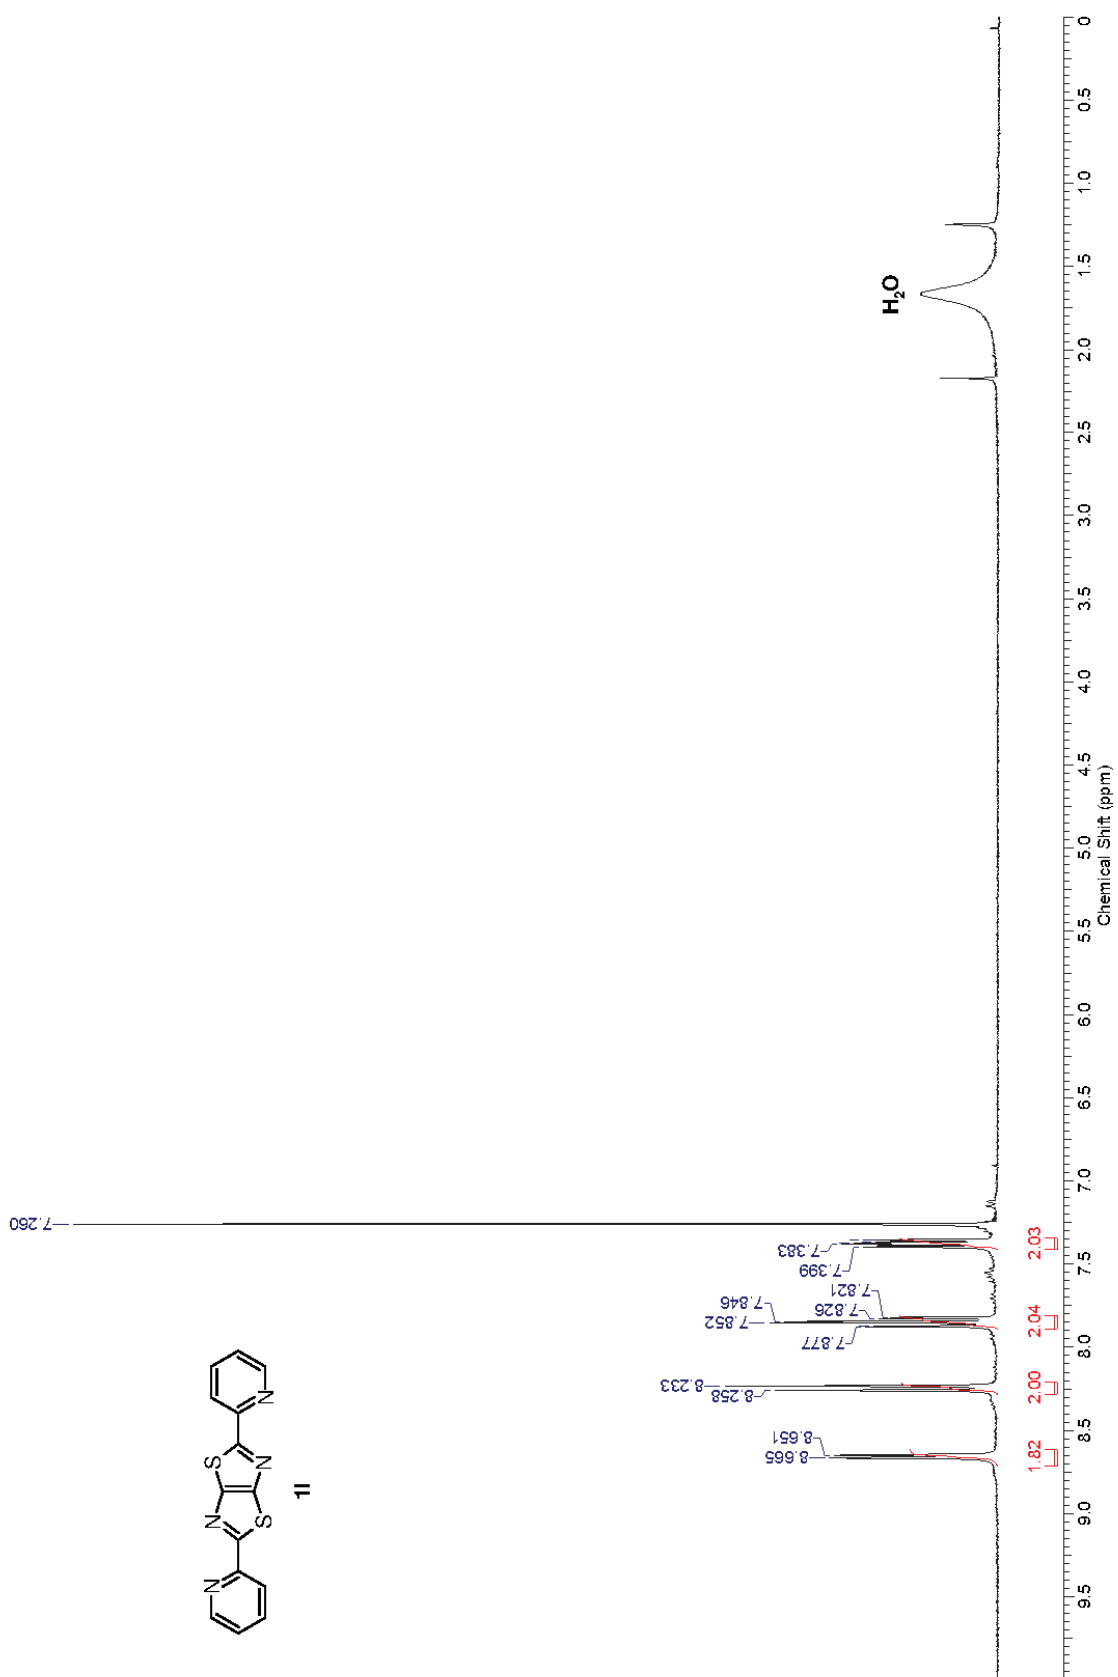

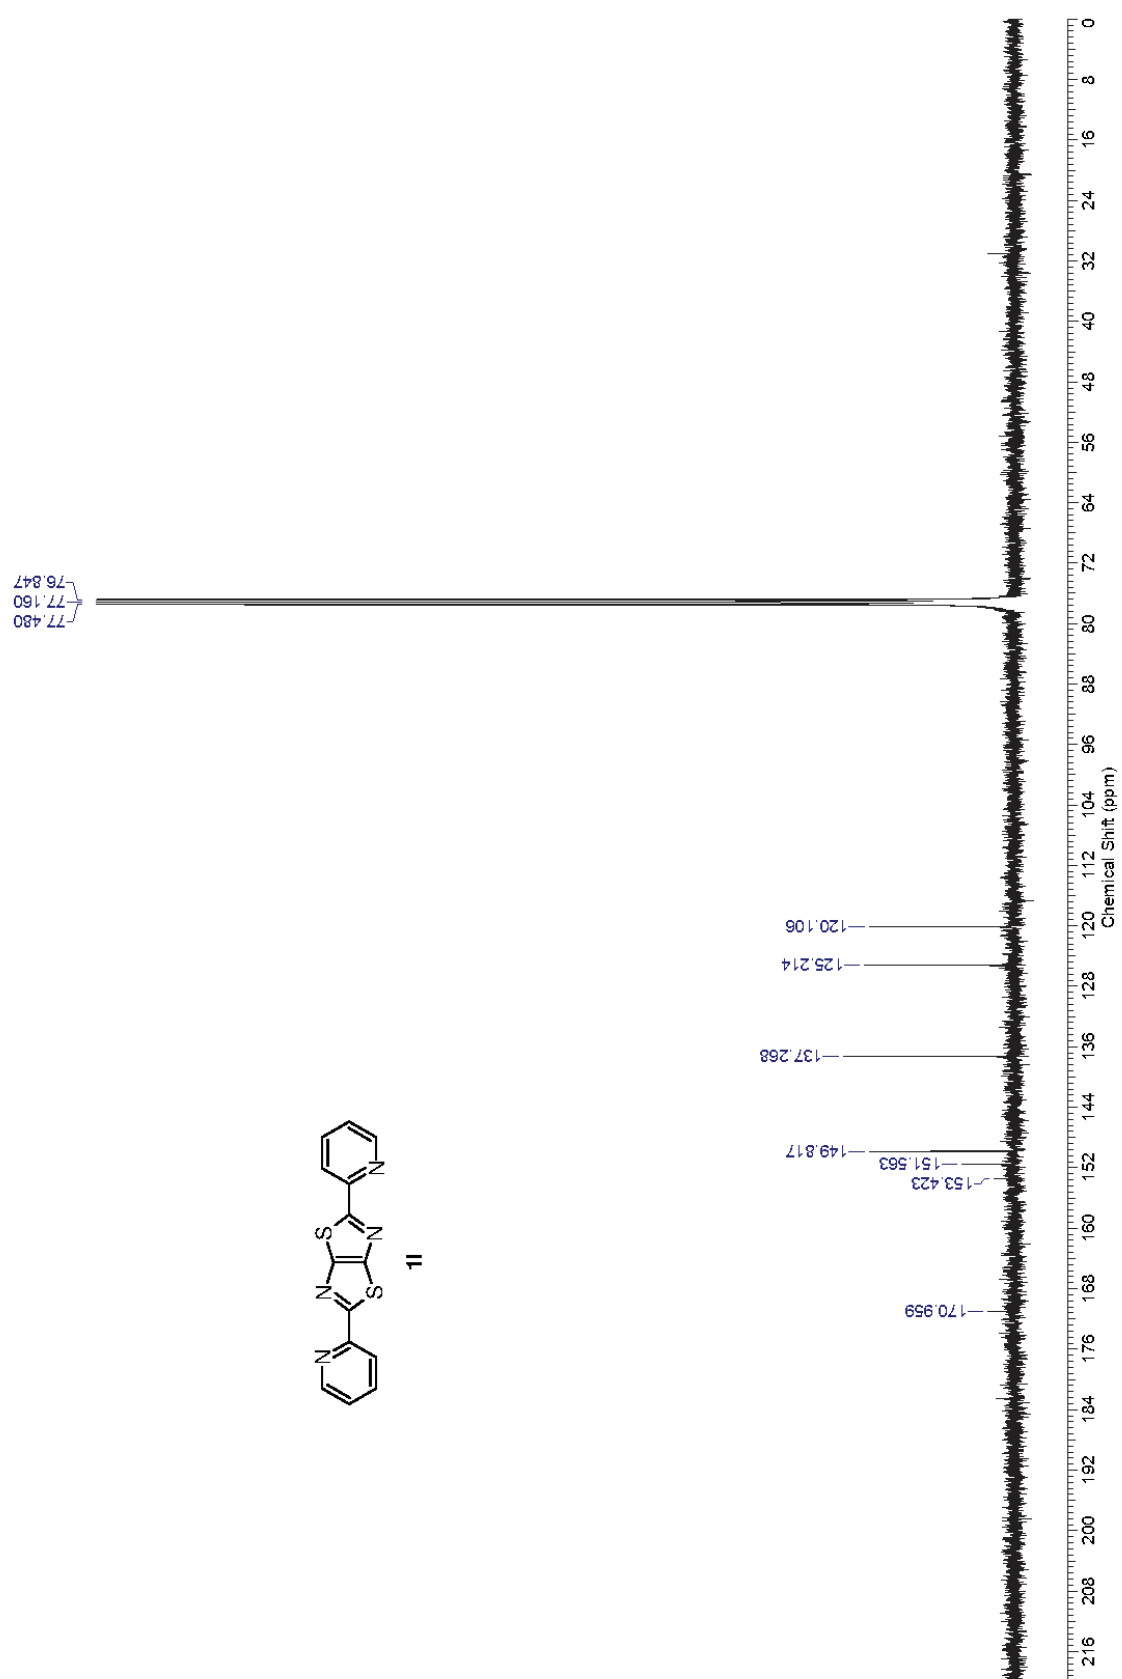

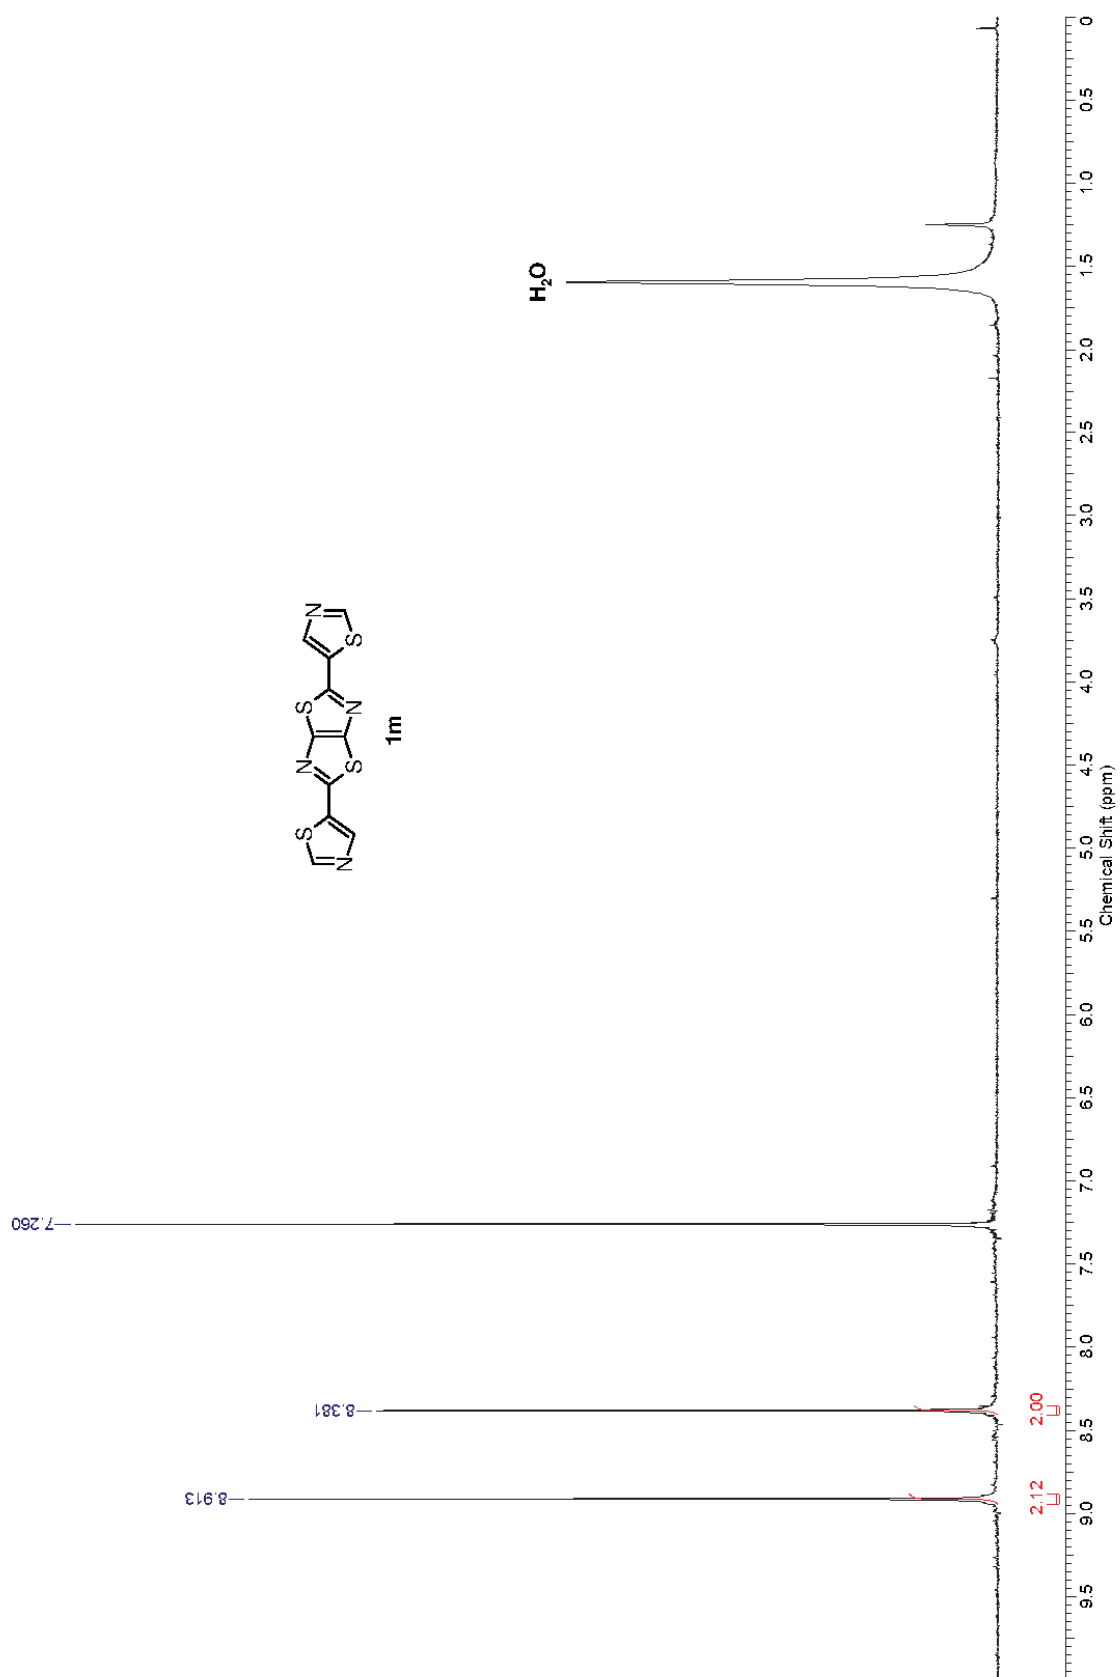

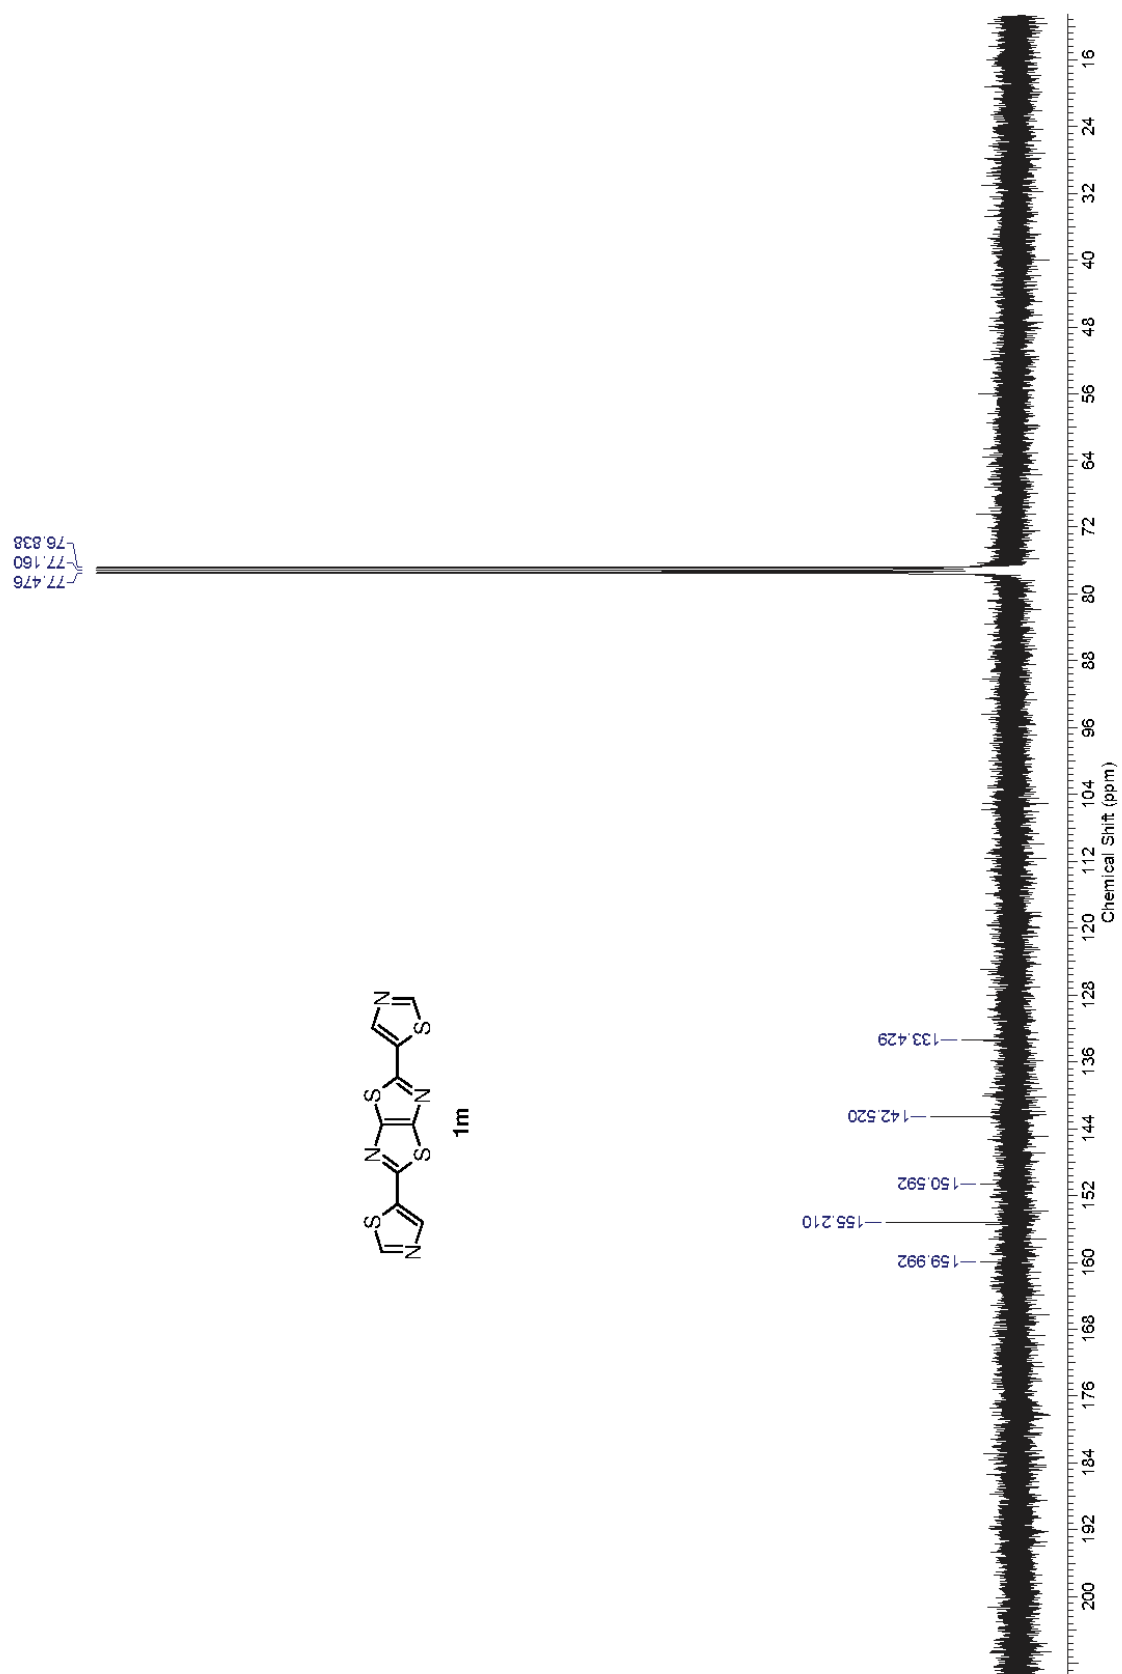

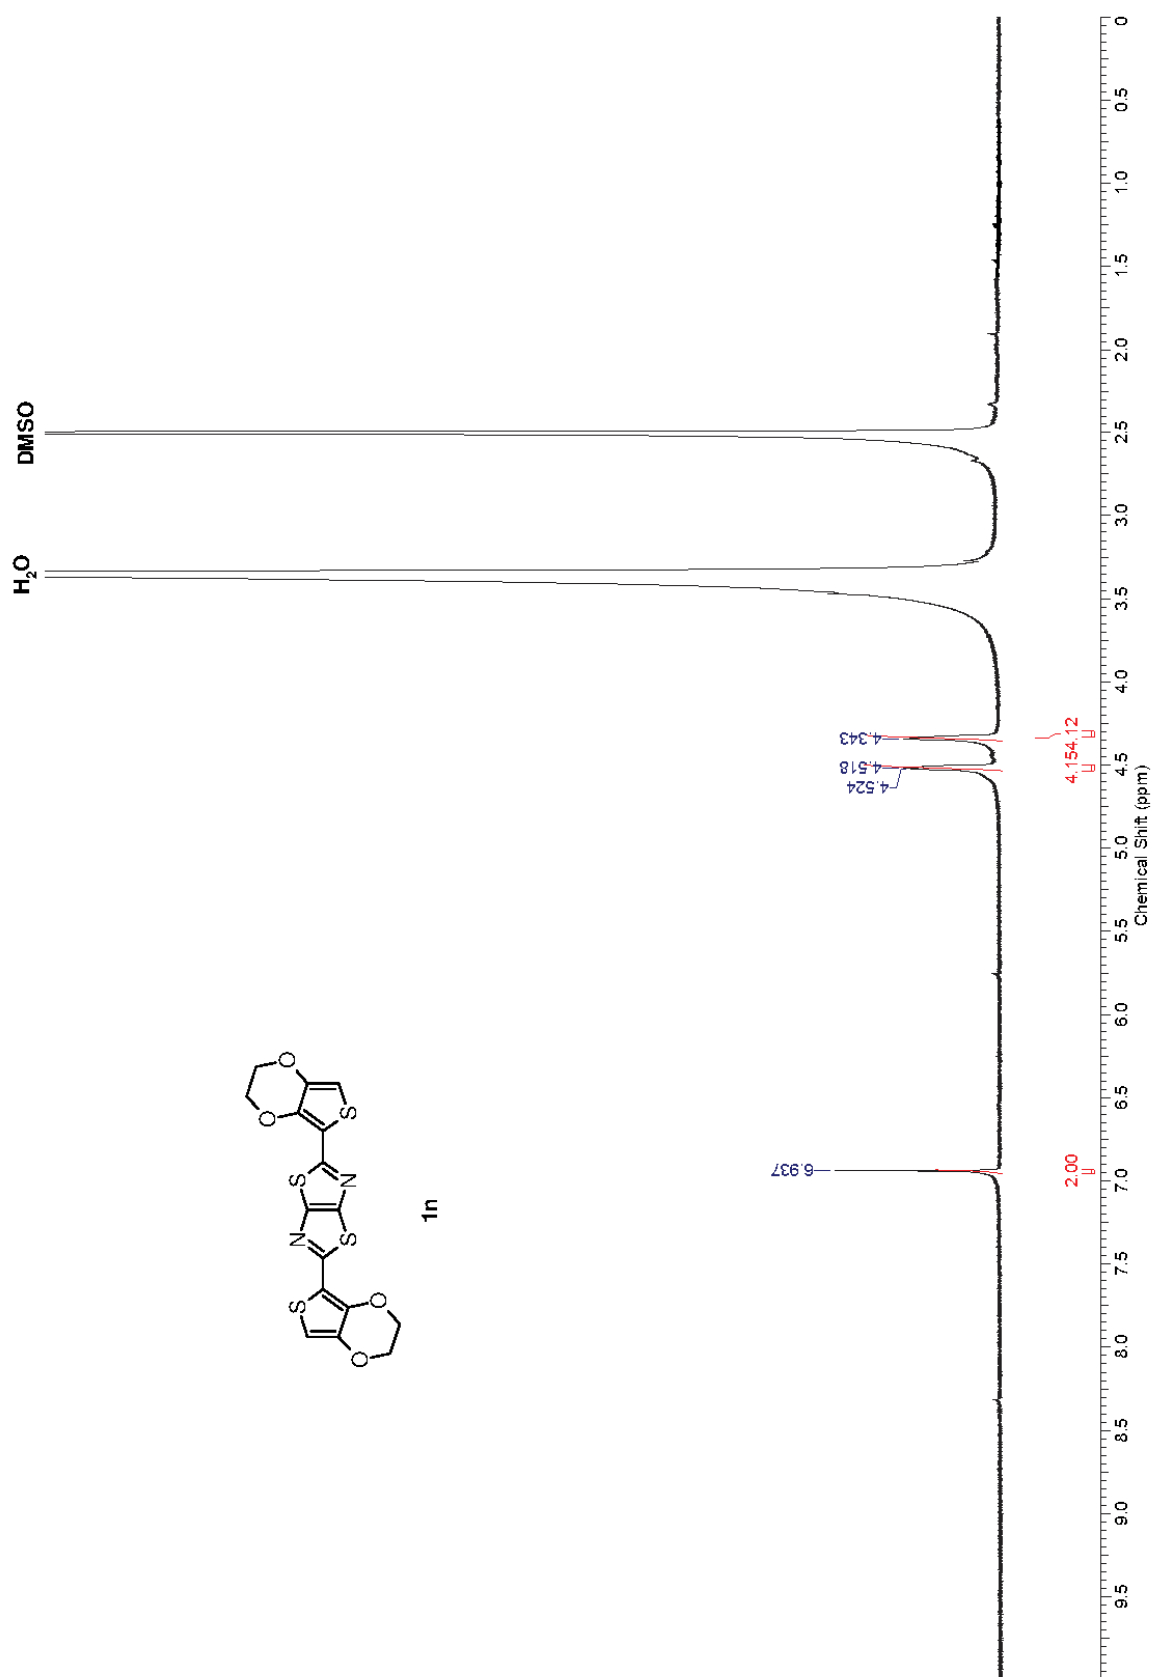

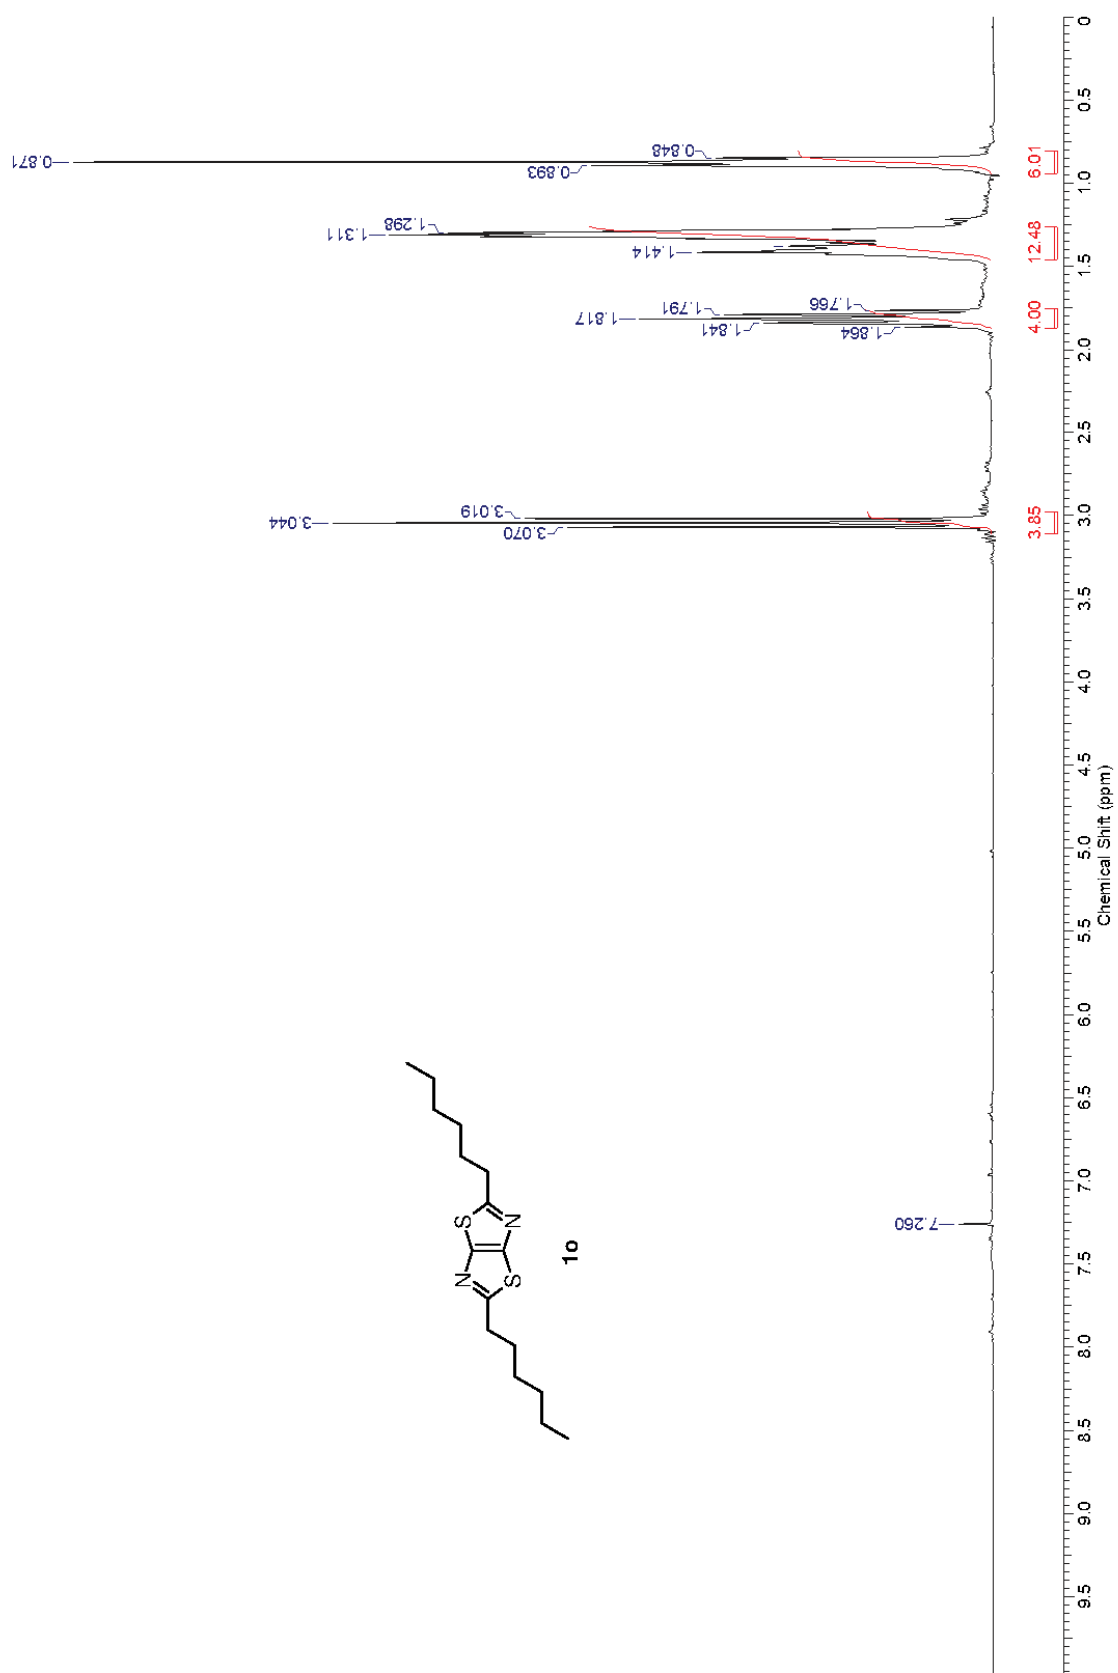



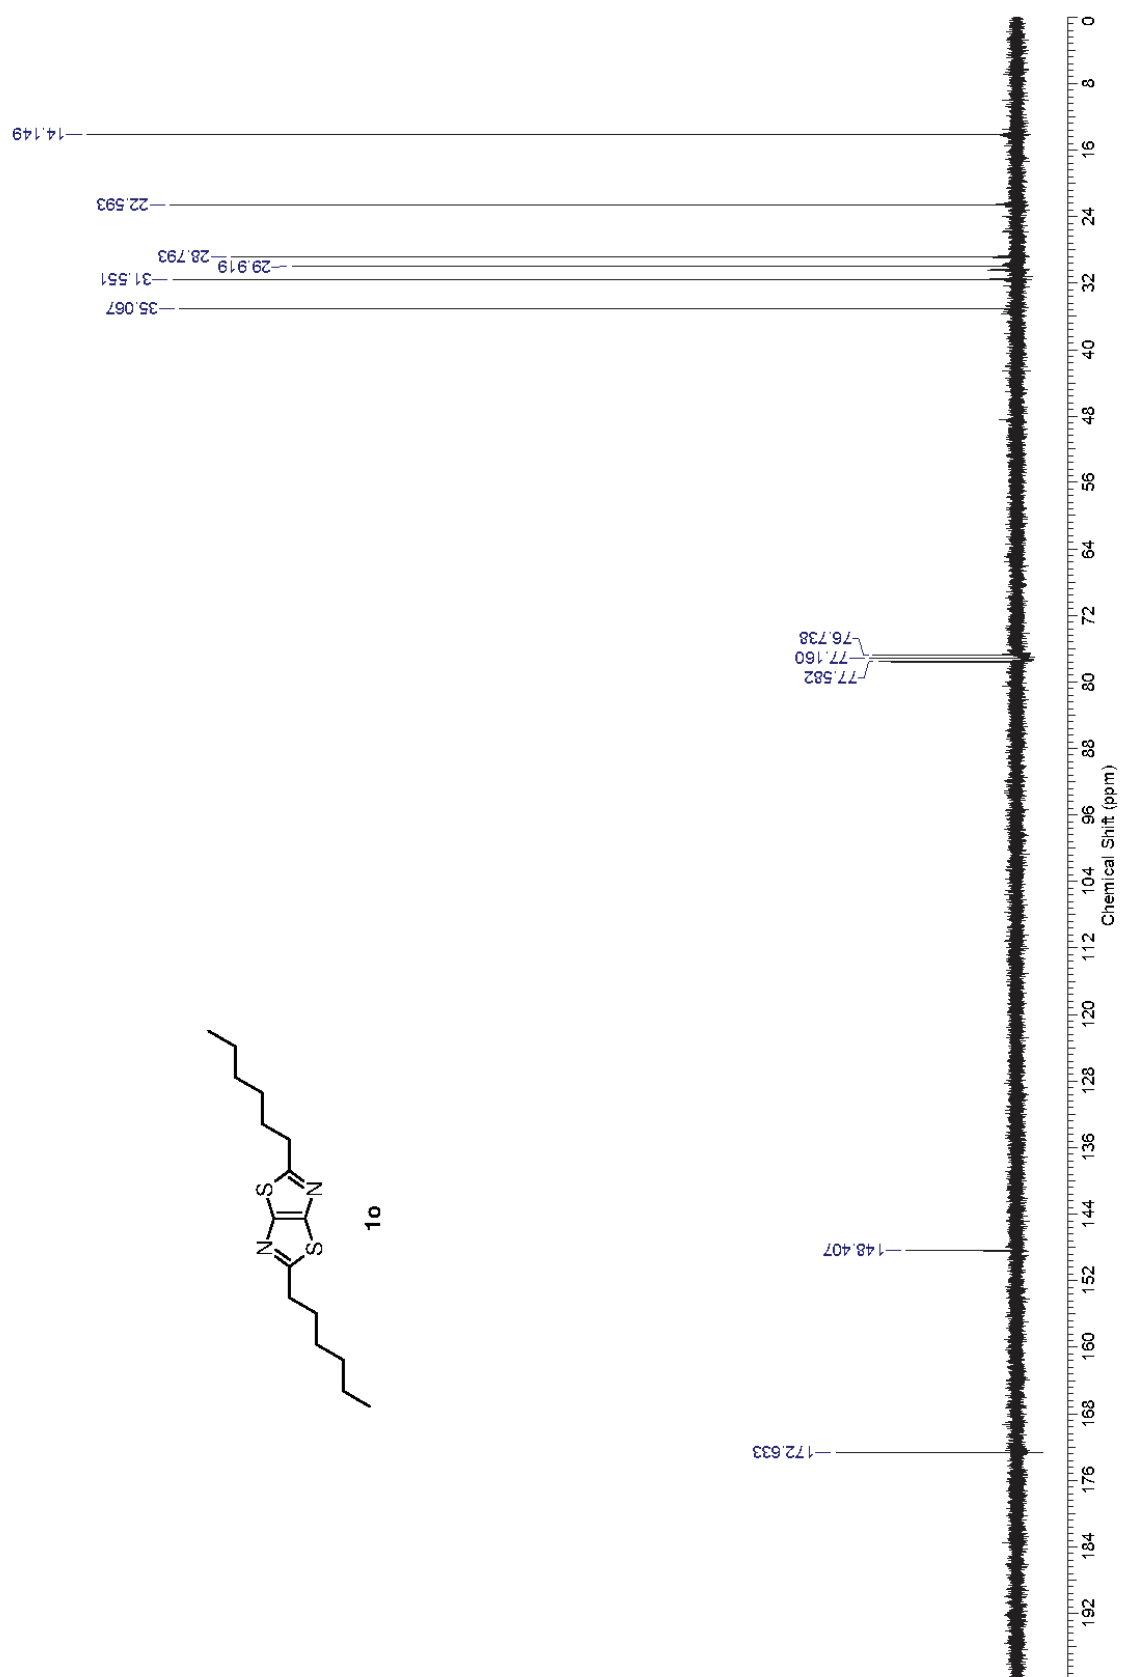

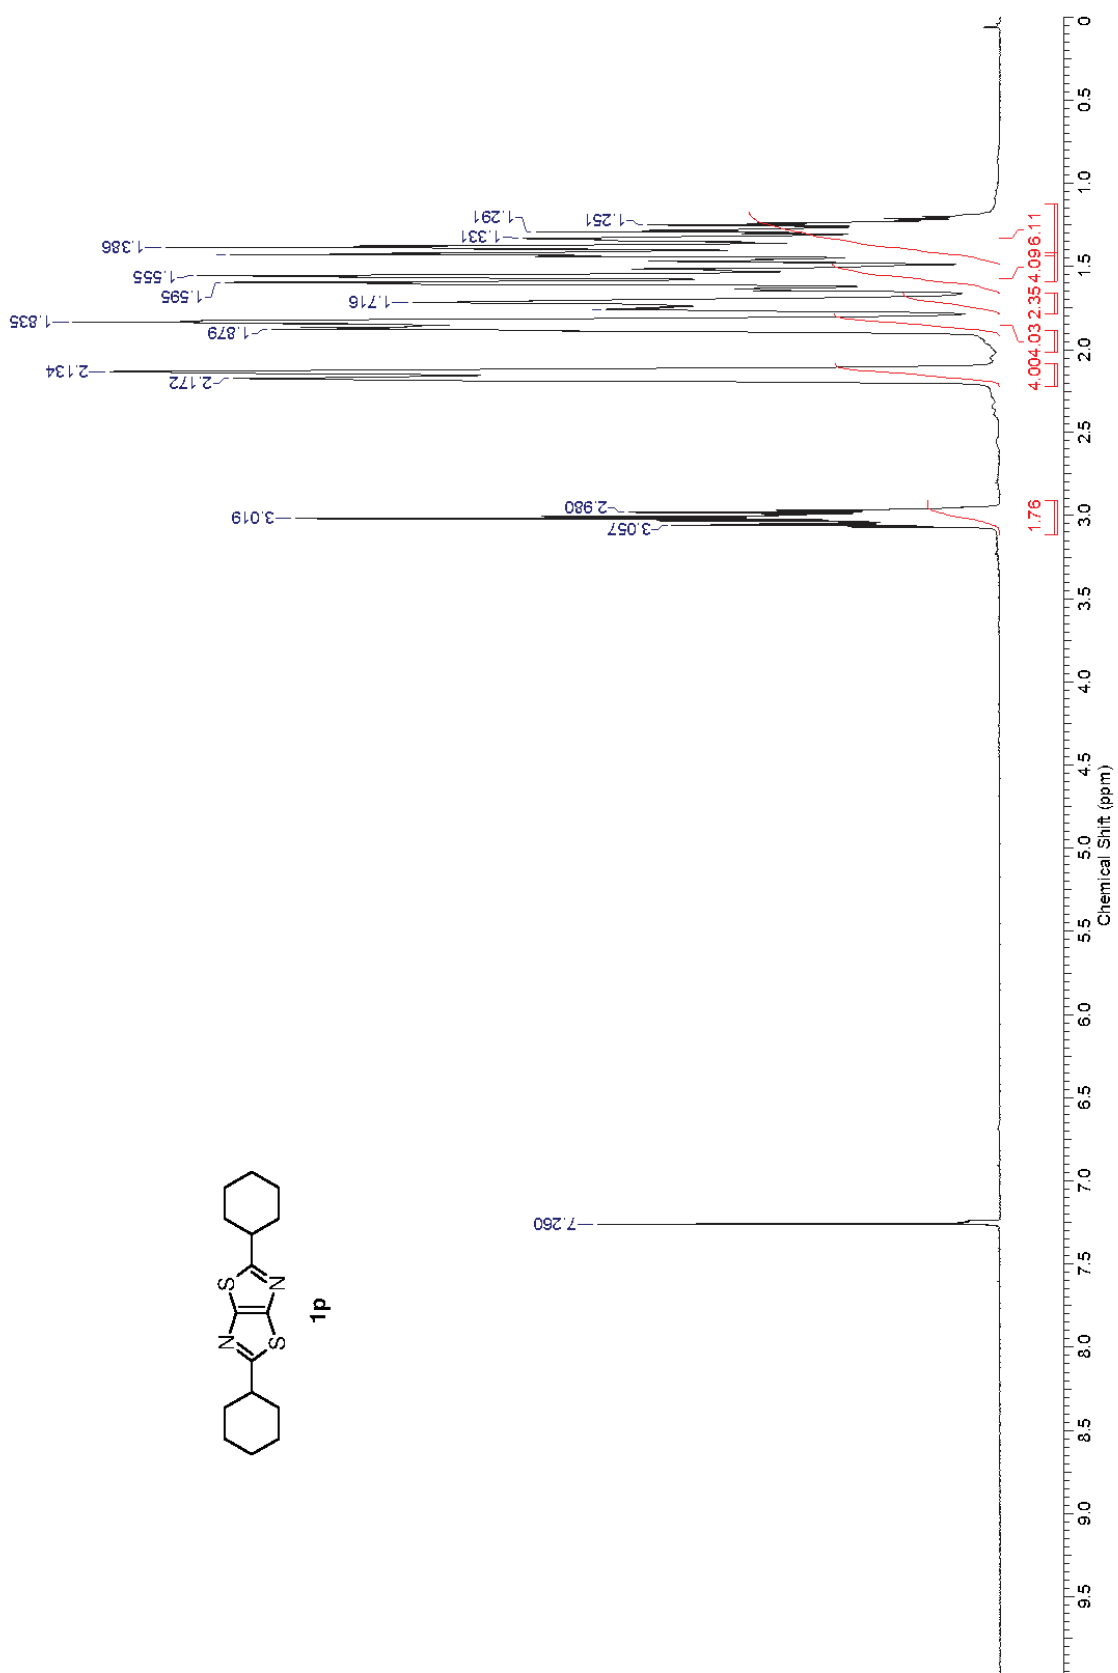

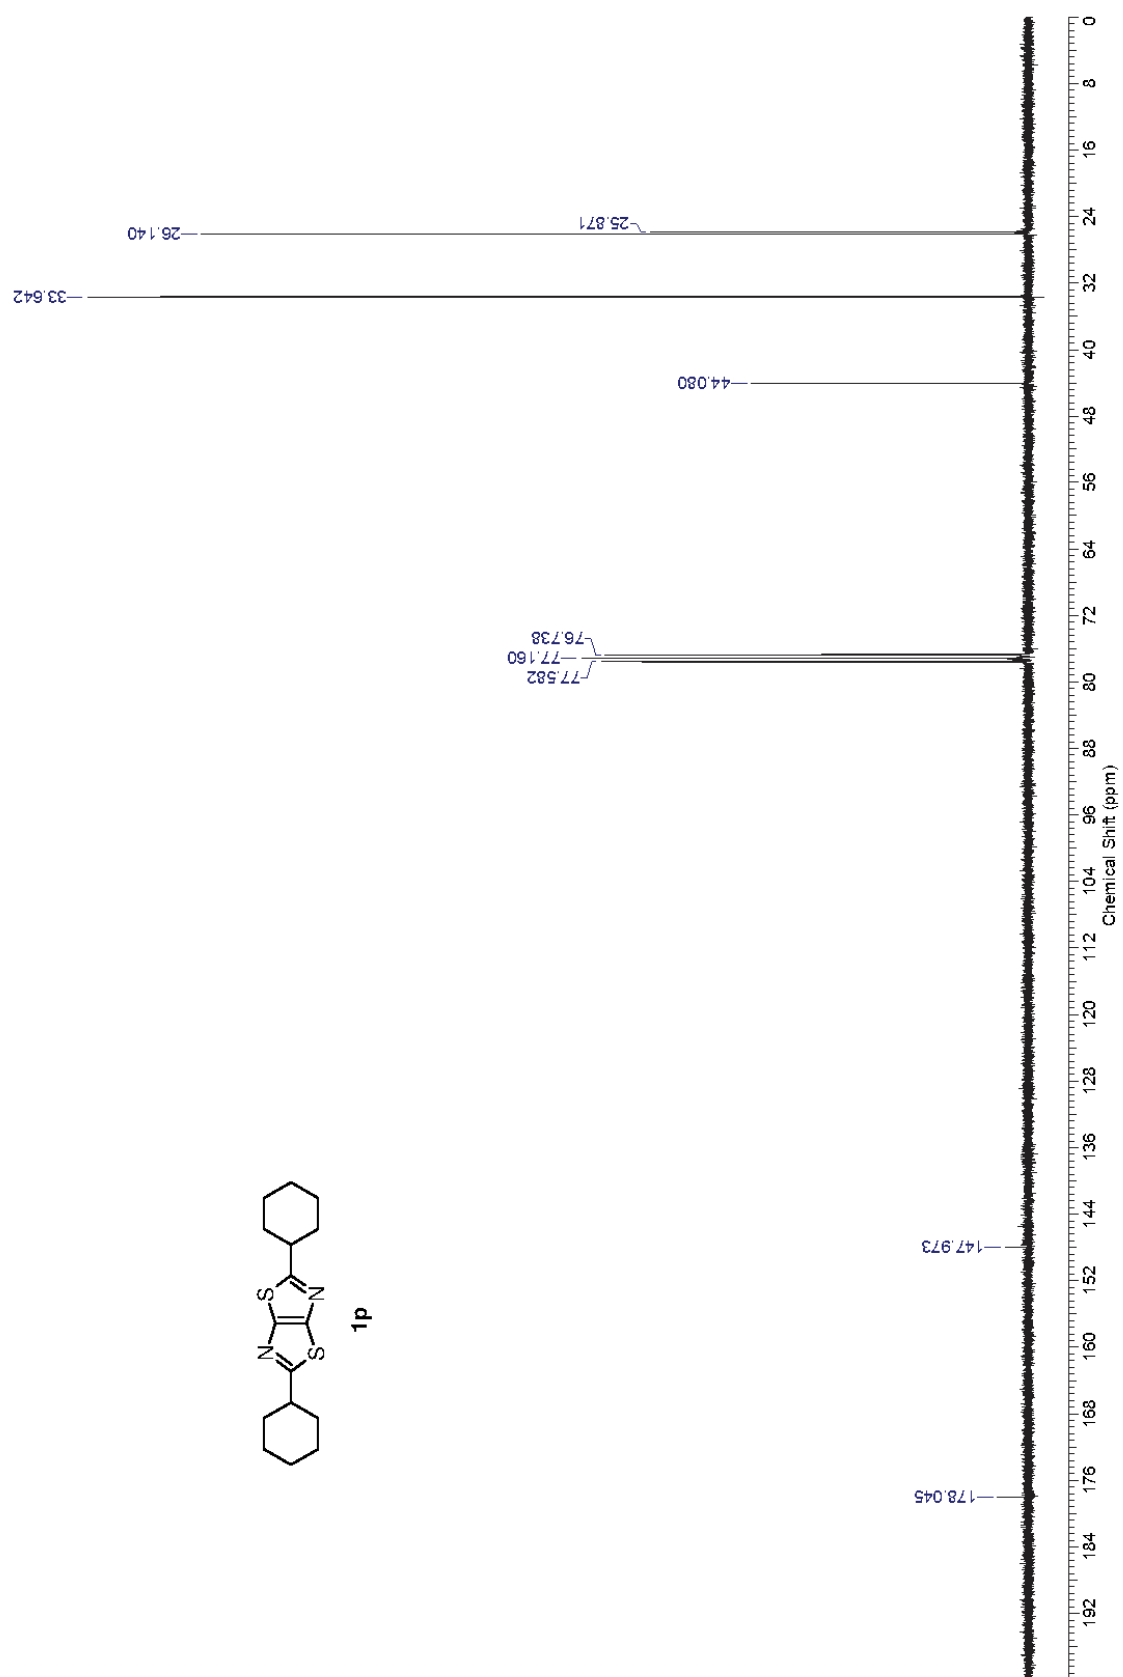

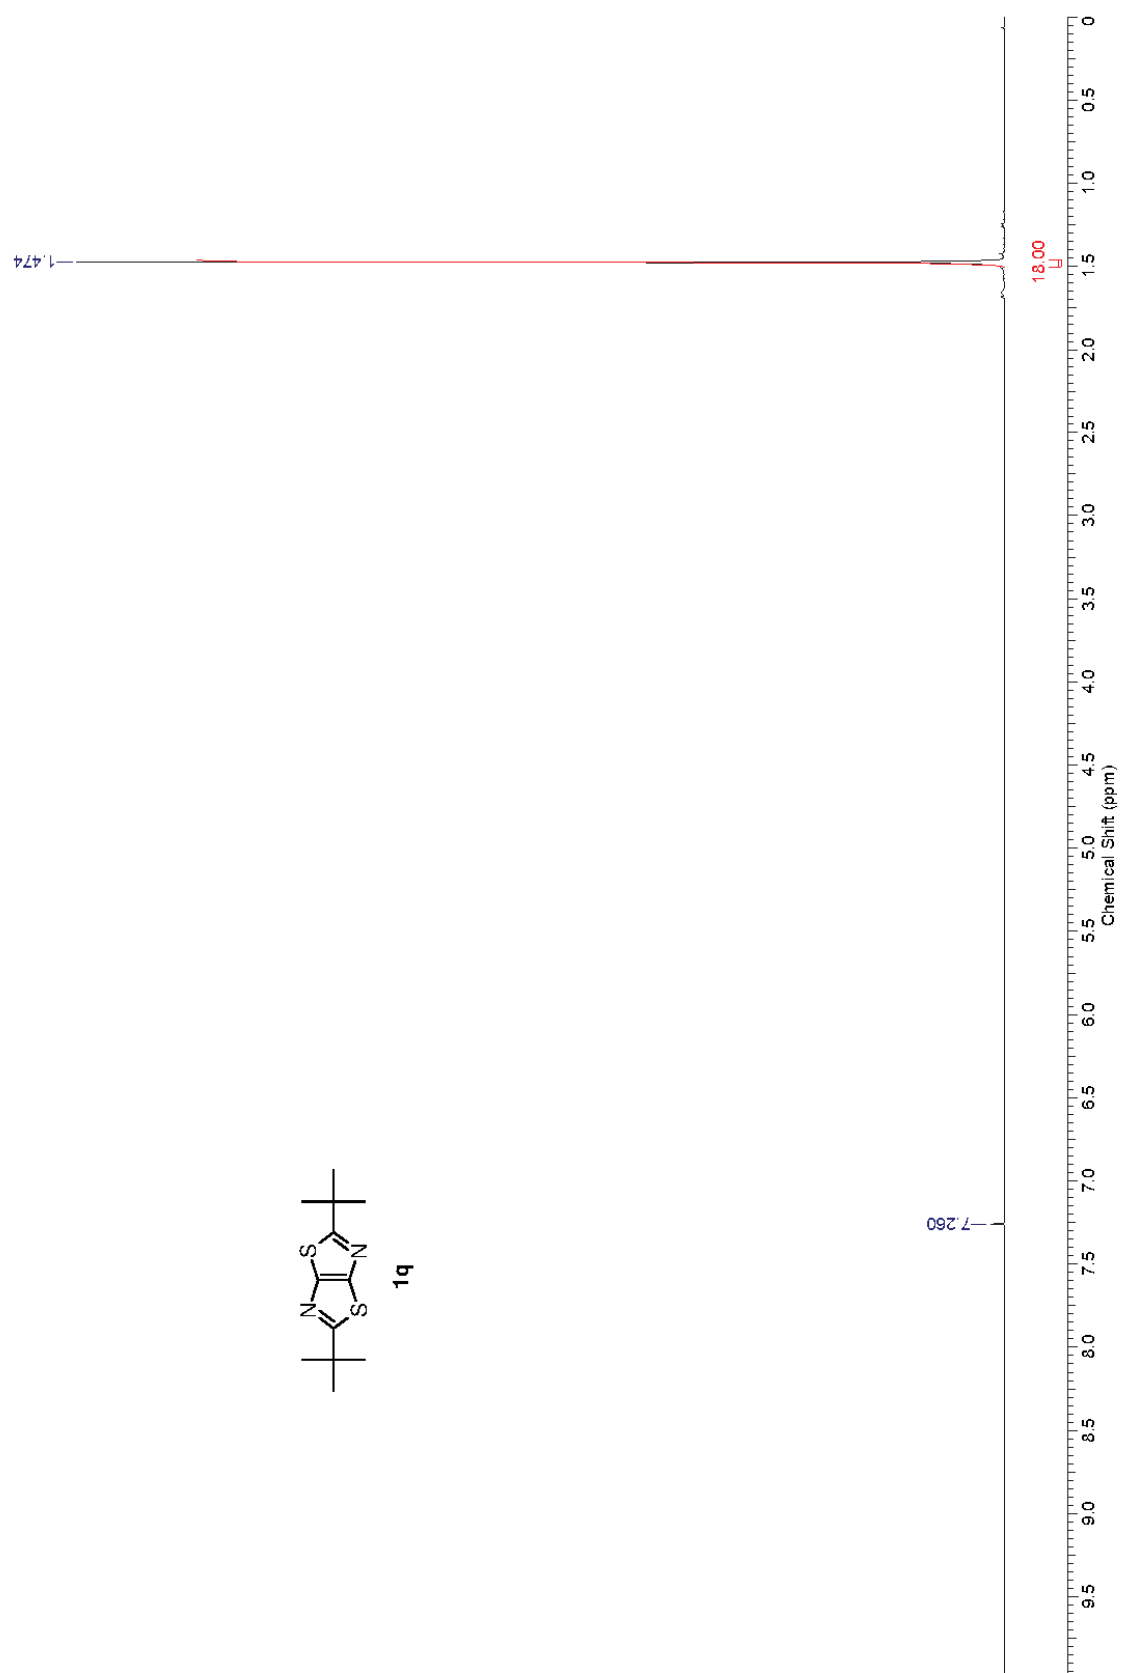

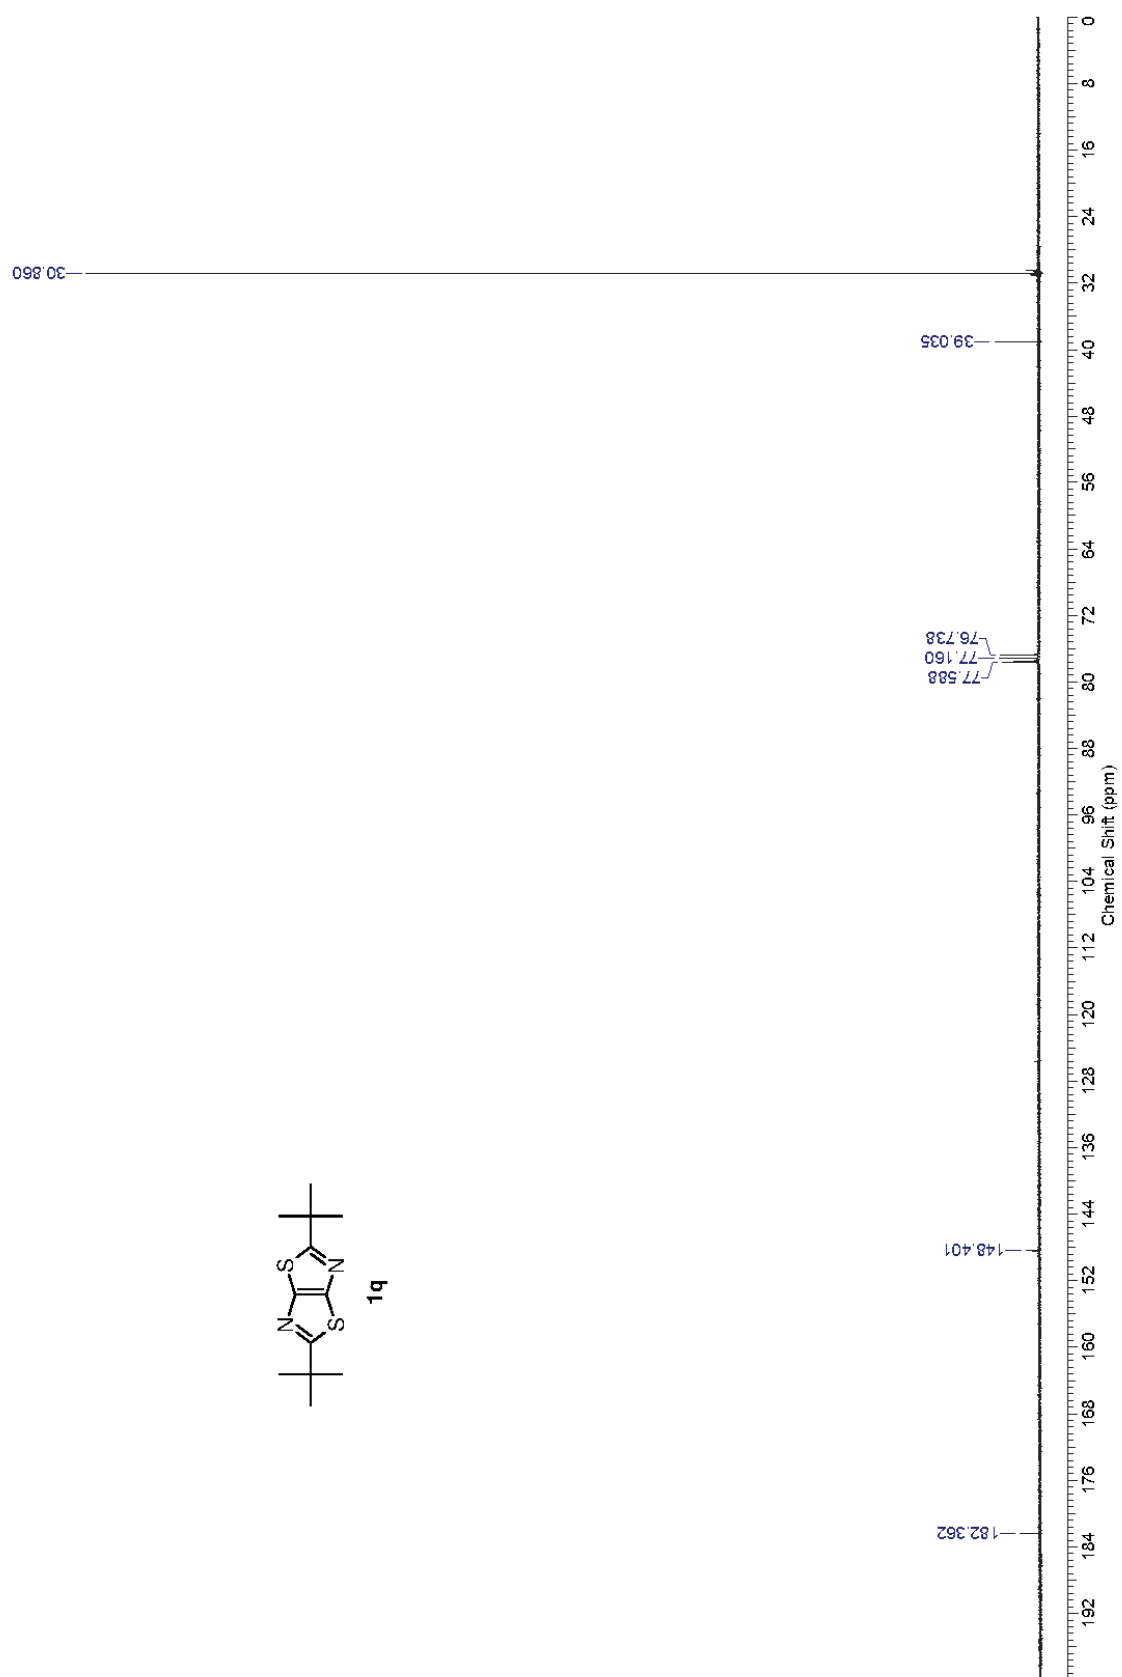

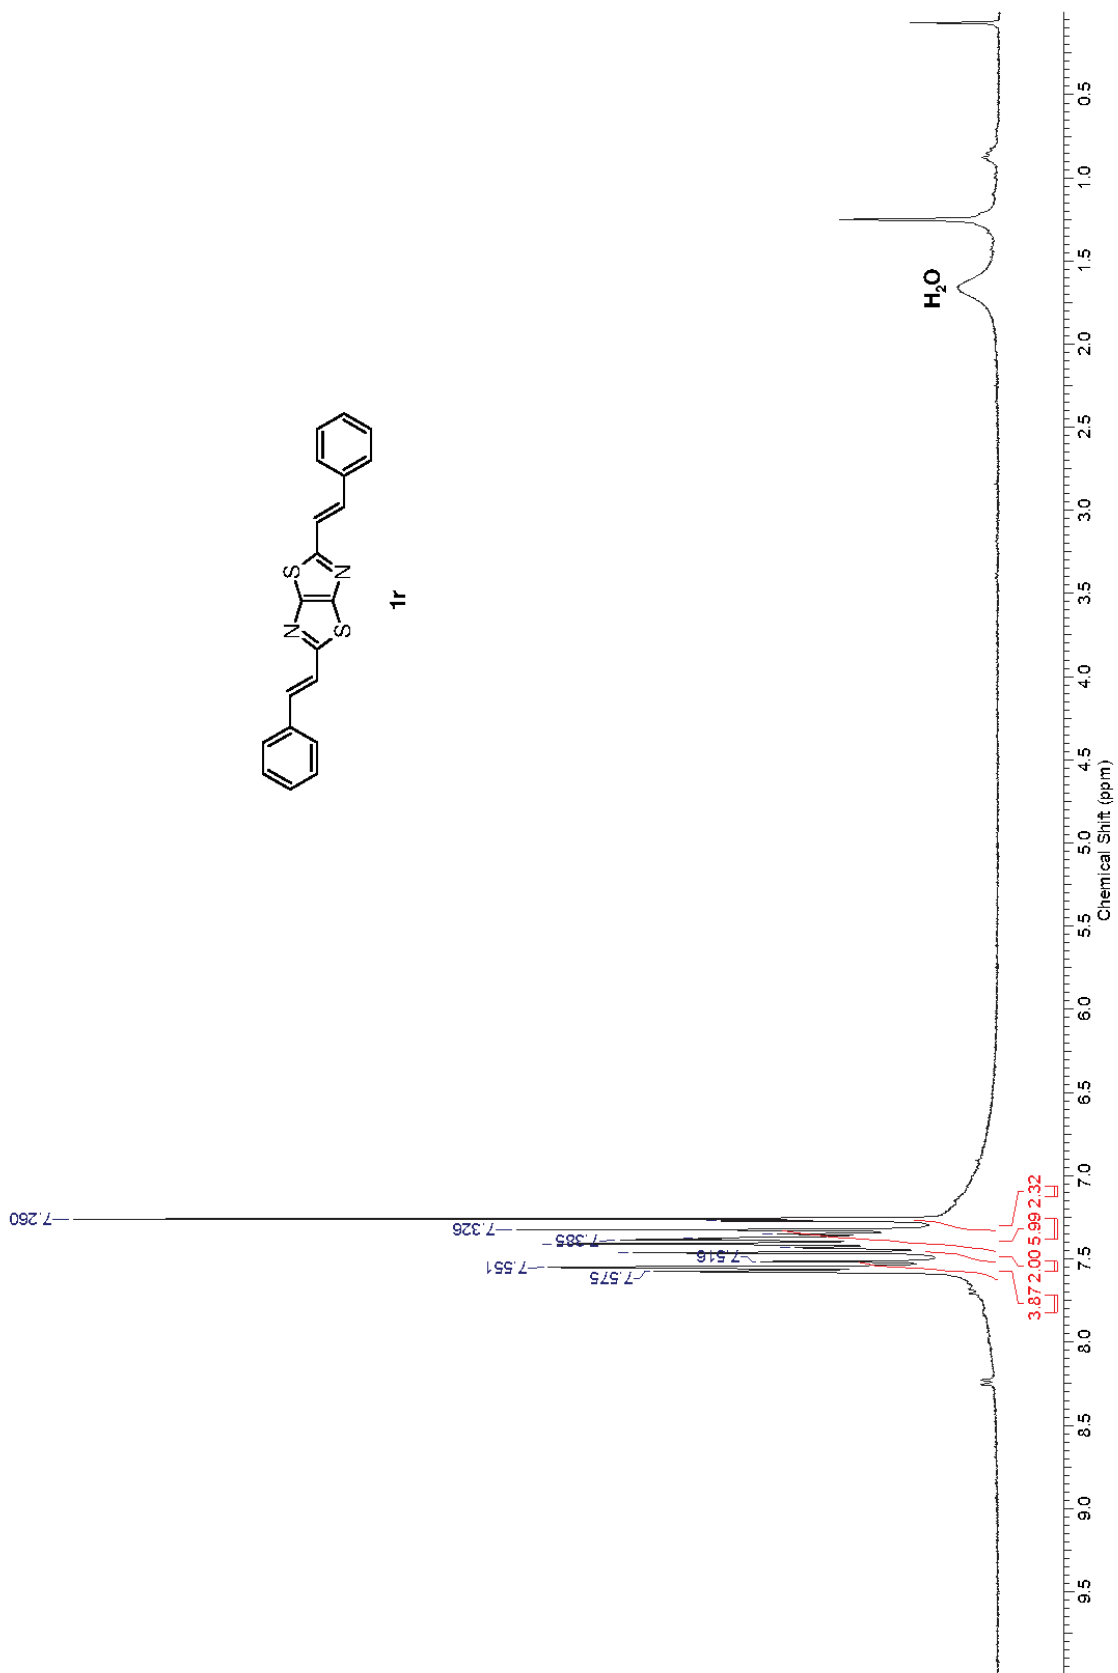

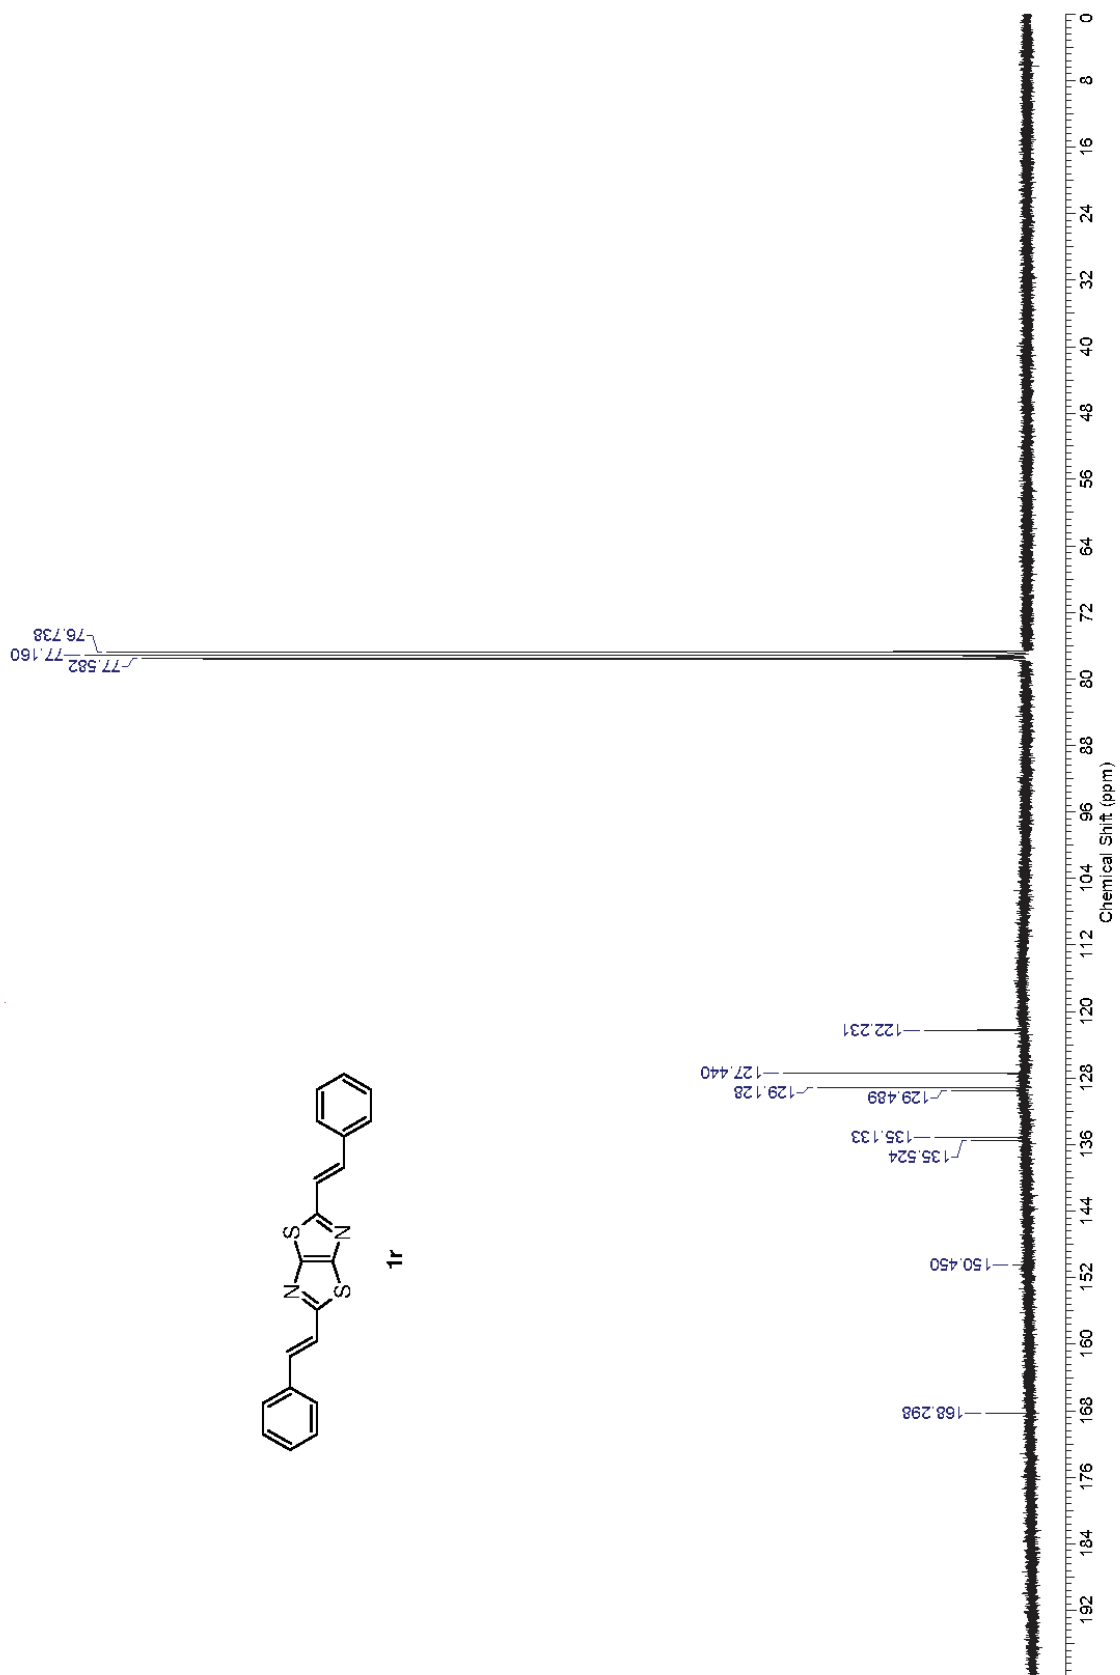

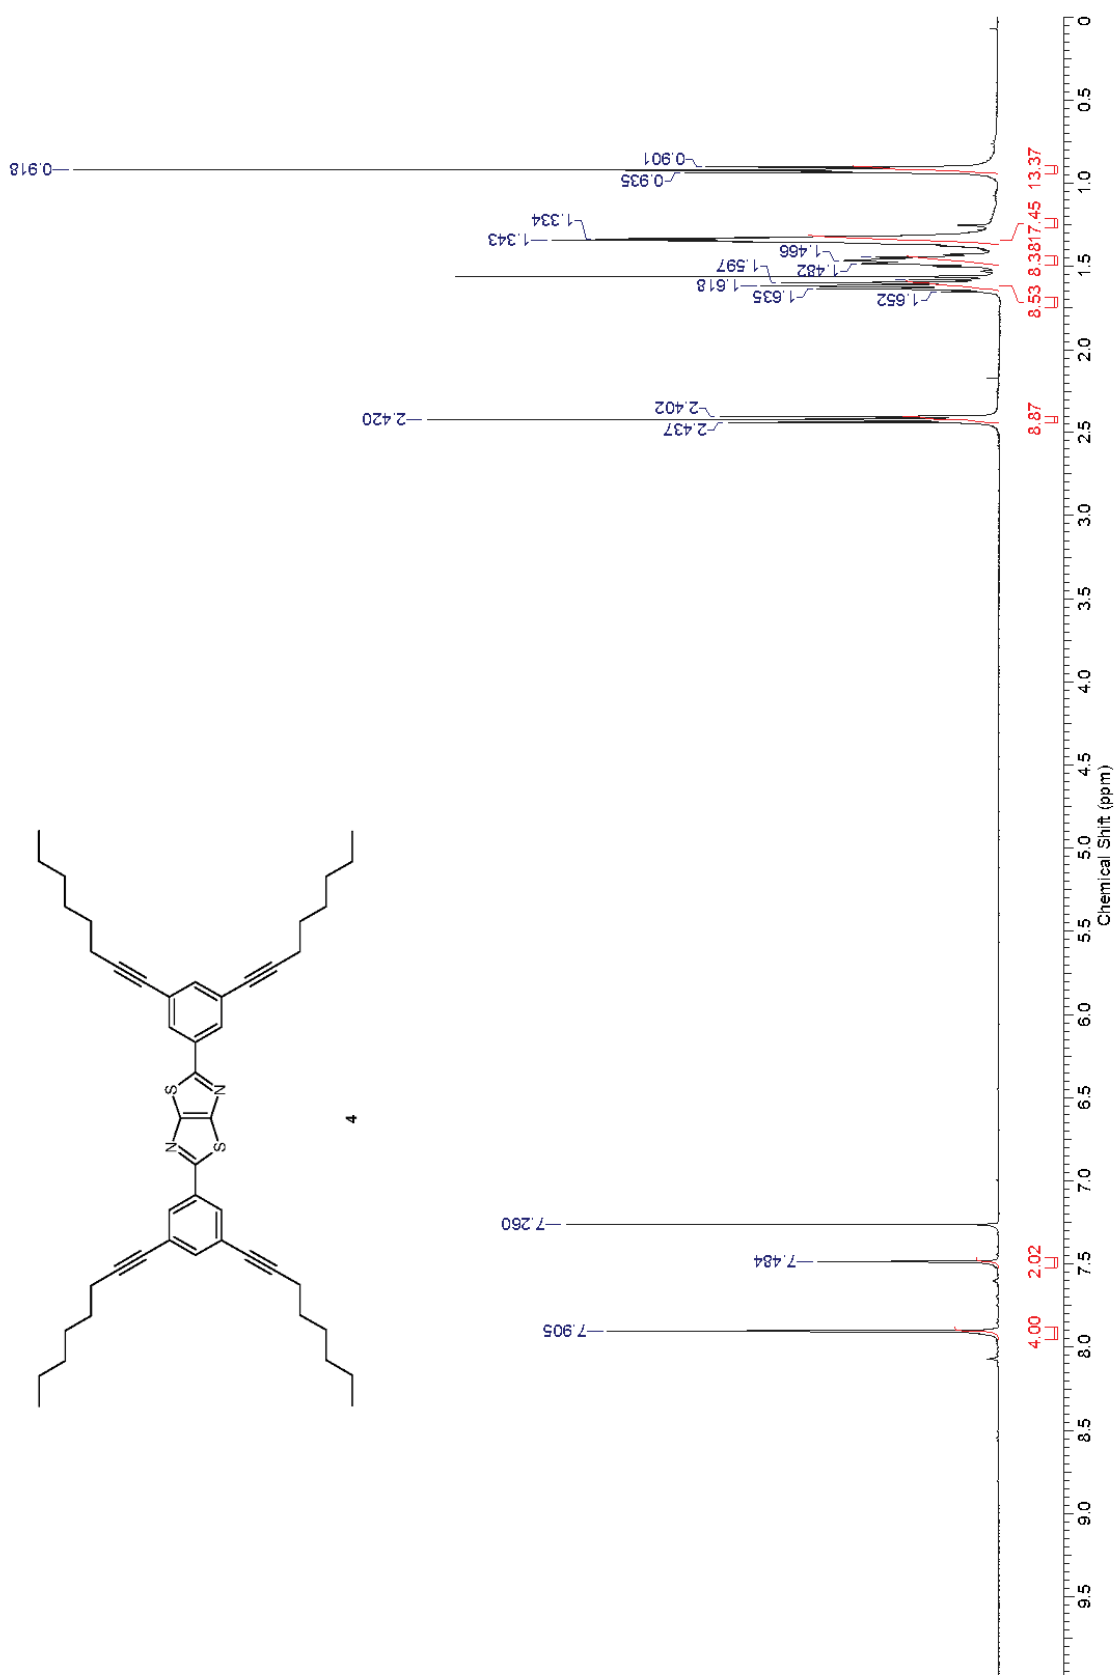



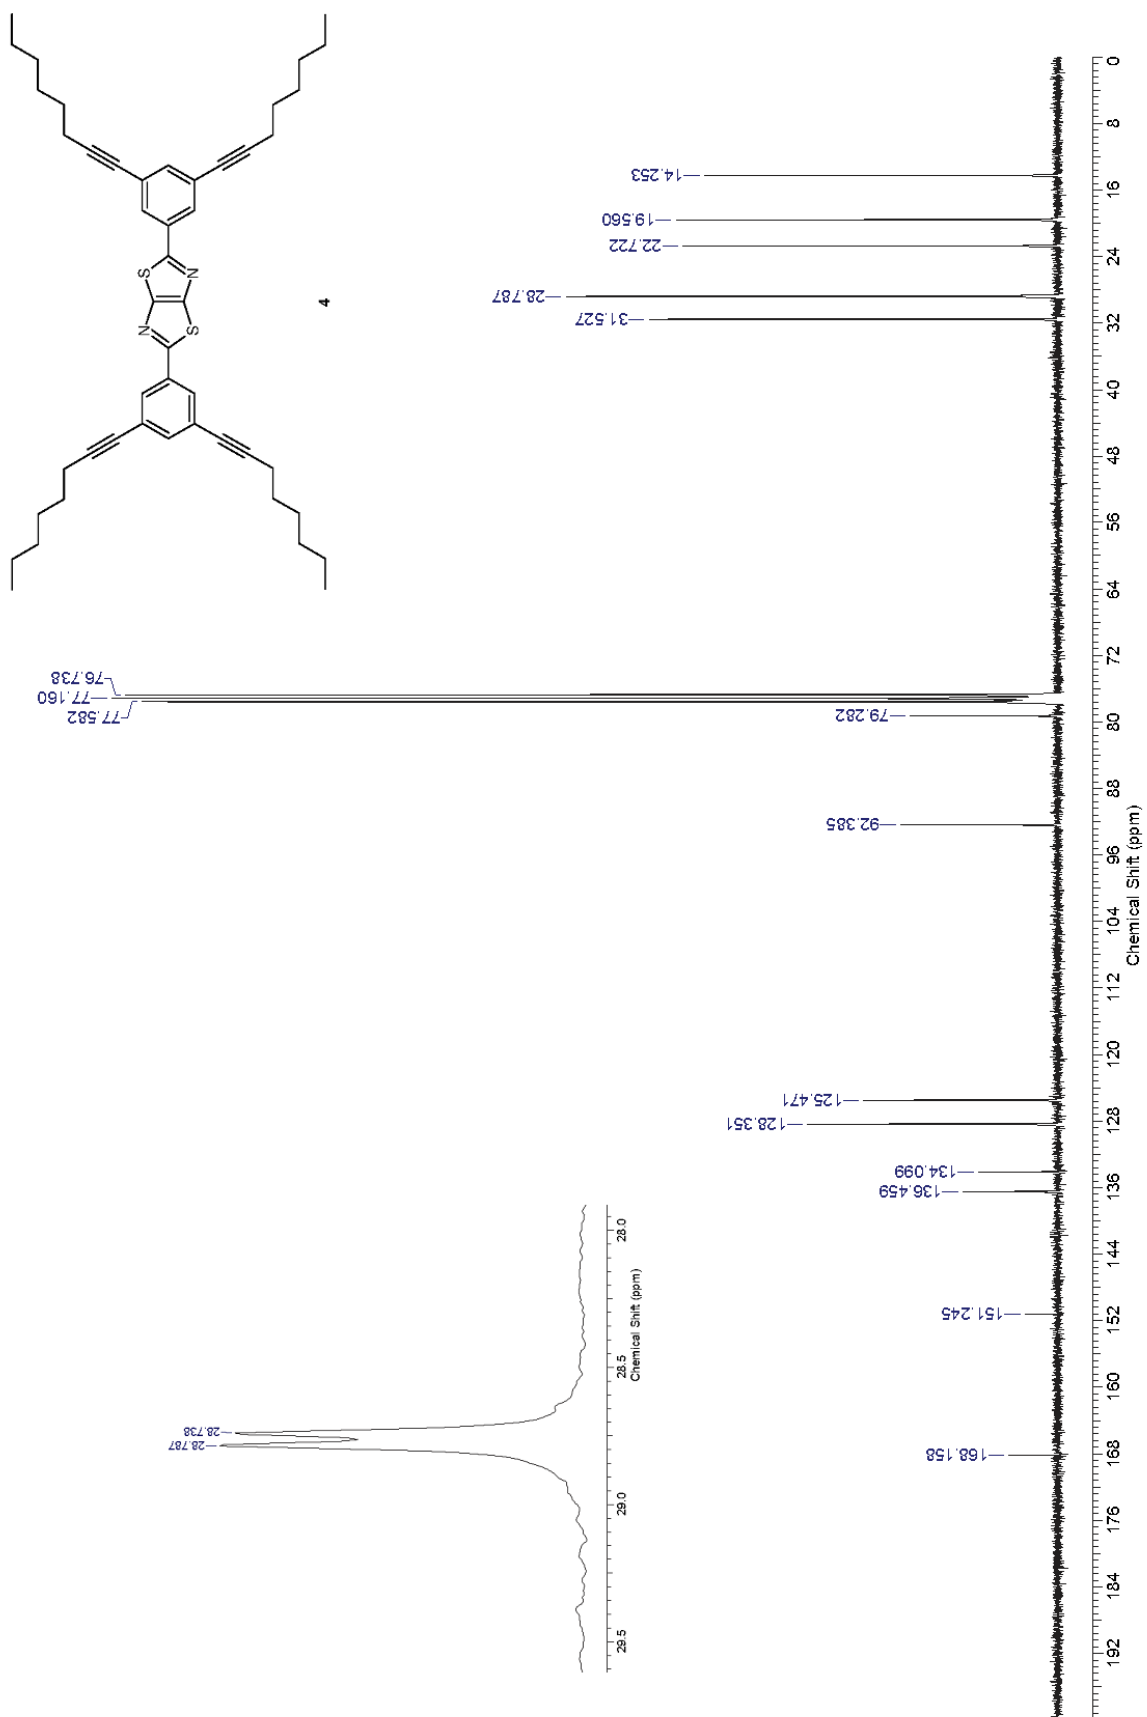

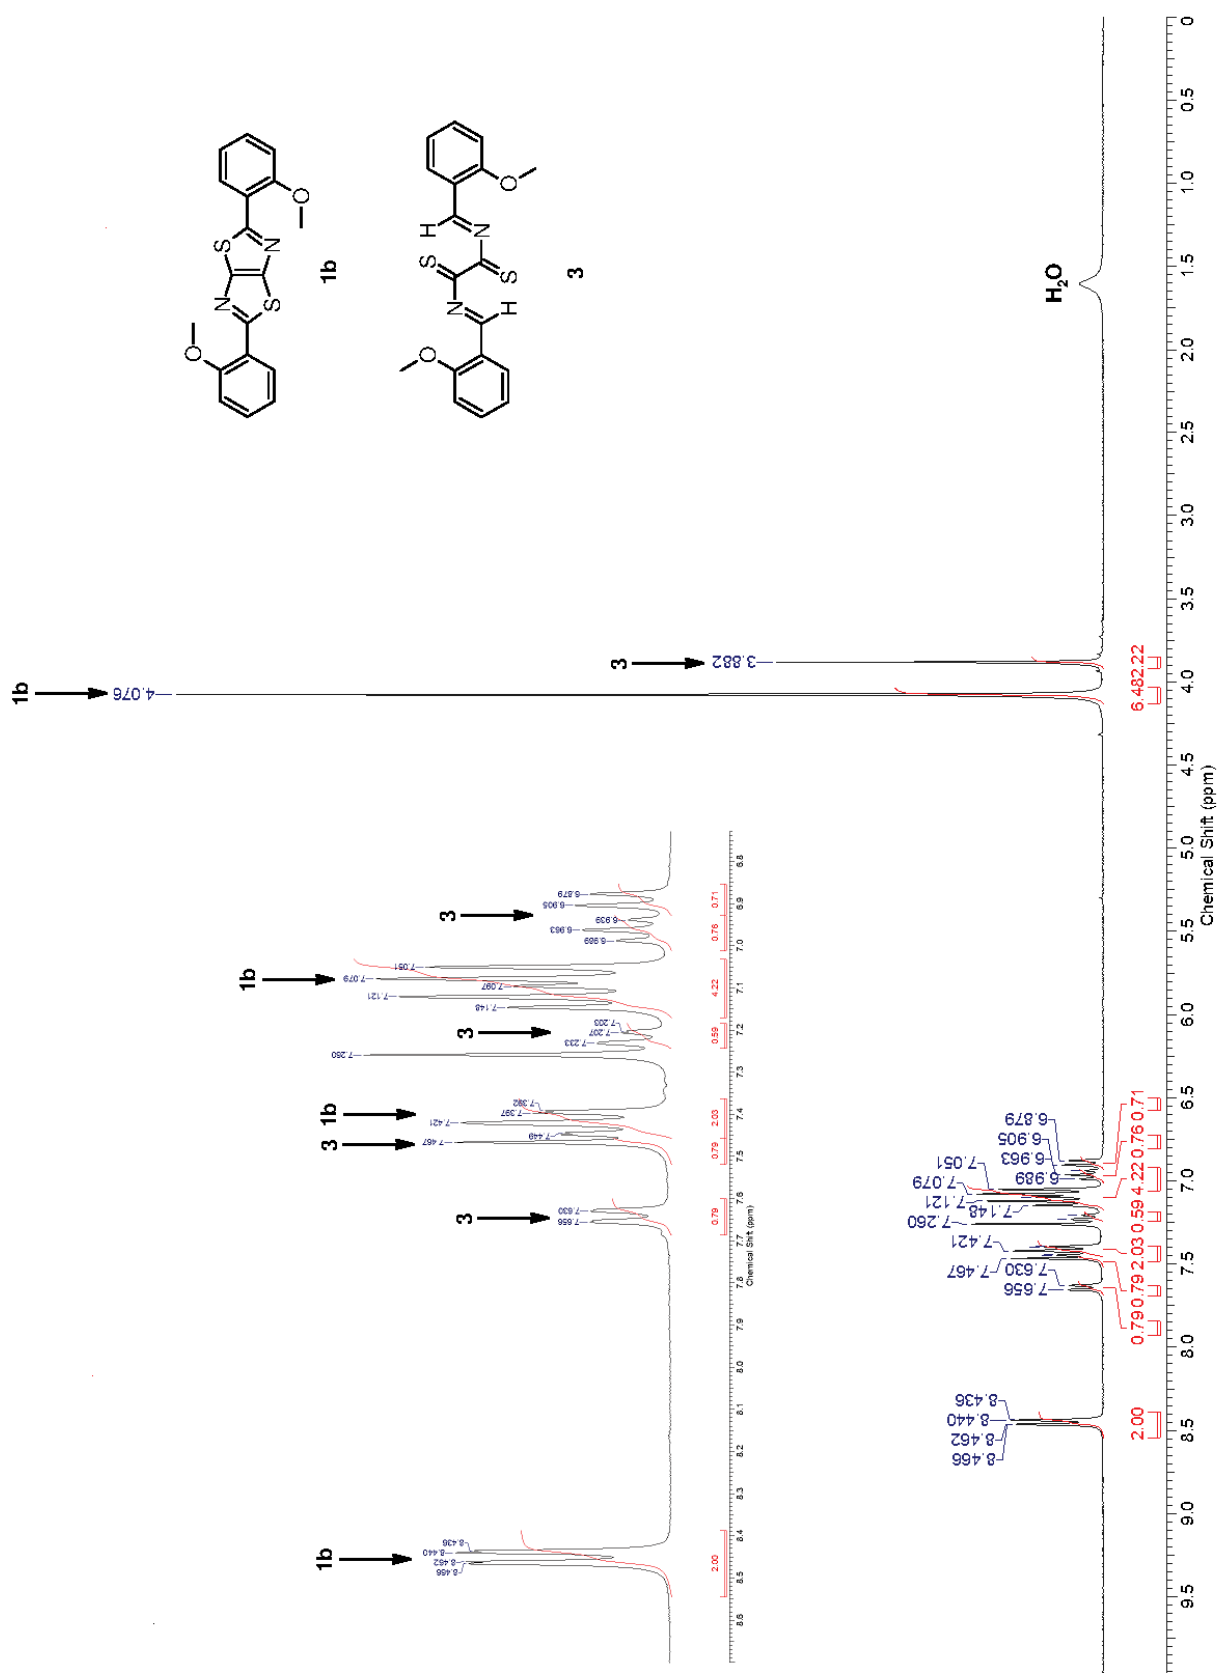

Supplement: c3ra45015e.pdf [file c3ra45015e.pdf]
